# Supplementary material for: Evolution of the vertebrate insulin receptor substrate (Irs) gene family
Source: PubMed Central journal article supplement (PMC5482937; doi:10.1186/s12862-017-0994-z), 2017-06-23
Supplement: 12862_2017_994_MOESM9_ESM.pdf [file 12862_2017_994_MOESM9_ESM.pdf]

Irs3:1

|       |                                                              |      |      |      |              |
|-------|--------------------------------------------------------------|------|------|------|--------------|
|       | 9363                                                         | 9373 | 9383 | 9393 |              |
| 9362: | -----CGCTGTATTGCCTTCGGCTCCGGATGAAGCCC                        |      |      |      | Mouse_lemur  |
| 8988: | CAGCCCCCTTCCTCCAAC . A . T . . . . . GG . A . CA . . . . . G |      |      |      | Bushbaby     |
| 9269: | CTGCCTC--TTCTGCAGC . A . T . . . . . C . C . T . A . . . . . |      |      |      | Human        |
| 9269: | CTGCCTC--TTCTGCAGC . A . T . . . . . C . C . T . A . . . . . |      |      |      | Chimpanzee   |
| 8769: | CTGCCTC--TTCTGCAGC . A . T . . . . . C . T . A . . . . .     |      |      |      | Gorilla      |
| 9270: | CTGCCTC--TCCTGCAGC . A . T . . . . . C . T . A . . . . .     |      |      |      | Orangutan    |
| 8798: | CTGCCTC--TCCTGCAGC . A . T . . . . . C . T . A . . . . .     |      |      |      | Gibbon       |
| 9350: | CTGCCTC--TCCTGCAGT . A . T . . . . . C . T . A . . . . .     |      |      |      | Macaque      |
| 9325: | CTGCCTC--TCCTGCAGT . A . . . . . C . T . A . . . . .         |      |      |      | Olive_Baboon |
| 8792: | CTACCCT--TCCTGTGGCTA . . T . C . . . . . AGC . T . . . . . T |      |      |      | Sq_monkey    |
| 9222: | CCACCCT--TCCTGTGGCTA . . --- . . . . . CAGC . T . . . . . G  |      |      |      | Marmoset     |

Irs3:1

|       |                                                                                   |      |      |      |      |              |
|-------|-----------------------------------------------------------------------------------|------|------|------|------|--------------|
|       | 9403                                                                              | 9413 | 9423 | 9433 | 9443 |              |
| 9394: | GCAGGCGGCAGCCCCACGGAAAGCCAGGGTCCAAGTGCGCCGACGTGTC                                 |      |      |      |      | Mouse_lemur  |
| 9038: | . T . A . . . . . G . . T . . . . TG . . . . . TT . . T . . C .                   |      |      |      |      | Bushbaby     |
| 9317: | . . . . . G . . . . GG . . G . . GG . AA . G . . . . . C . . . . C .              |      |      |      |      | Human        |
| 9317: | . . . . . G . . . . GG . . G . . GG . AA . G . . . . . C . . . . C .              |      |      |      |      | Chimpanzee   |
| 8817: | . . . . . G . . . . GG . . G . . GG . AA . G . . . . . C . . . . C .              |      |      |      |      | Gorilla      |
| 9318: | A . . . . . G . . . . GG . . G . . GGCAA . G . . . . . T . . . . C .              |      |      |      |      | Orangutan    |
| 8846: | . . . . . G . . . . GG . . G . . TGG . AA . G . . . . . AC . . . . C .            |      |      |      |      | Gibbon       |
| 9398: | A . GAA . . . . G . . . . GG . . G . . GG . AA . G . . . . . AC . A . . C .       |      |      |      |      | Macaque      |
| 9373: | A . GA . . A . . G . . . . GG . . G . . GG . AA . G . . . . . C . A . . C .       |      |      |      |      | Olive_Baboon |
| 8840: | . . . . . TG . . . . GG . . C . . . . G . A . . . . C . A . AG . . G . CT . . C . |      |      |      |      | Sq_monkey    |
| 9267: | . . . . . TG . . . . GG . . CG . . . . G . A . . . . C . A . AG . . C . . . . C . |      |      |      |      | Marmoset     |

Irs3:1

|       |                                                                                       |      |      |      |      |              |
|-------|---------------------------------------------------------------------------------------|------|------|------|------|--------------|
|       | 9453                                                                                  | 9463 | 9473 | 9483 | 9493 |              |
| 9444: | CCTCGGCTCTCCGCTGCCCTGGGCCTACCCGGCCGACGTGCGACTCTGCG                                    |      |      |      |      | Mouse_lemur  |
| 9074: | . . . . . C . G . . A . . A . . G . . . . T . T . . . . AA . . C . . A . G . . . CT . |      |      |      |      | Bushbaby     |
| 9360: | . . . . A . . CAG . . . . . G . . T . . . . . GT . . . . .                            |      |      |      |      | Human        |
| 9360: | . . . . A . . CAG . . . . . G . . T . . . . . G . . . . .                             |      |      |      |      | Chimpanzee   |
| 8860: | . . . . A . . CAG . . . . . G . . T . . . . A . . AG . . . . .                        |      |      |      |      | Gorilla      |
| 9361: | . . . . A . . CAG . . . . . G . . T . . . . . G . . . . .                             |      |      |      |      | Orangutan    |
| 8889: | . . . . A . . CAG . T . . . . . A . . G . . T . . . . . G . . . . .                   |      |      |      |      | Gibbon       |
| 9441: | . . . . A . . CAG . . . . . G . . T . . A . . . . . C . . . . .                       |      |      |      |      | Macaque      |
| 9416: | . . . . A . . CAG . . . . . G . . T . . A . . . . . C . . . . .                       |      |      |      |      | Olive_Baboon |
| 8890: | . . . . A . . C . G . . . . . G . . T . . . . T . . C . . GT . . . . .                |      |      |      |      | Sq_monkey    |
| 9317: | . . . . A . TC . G . . . . . G . . T . . . . . C . . GT . . . . .                     |      |      |      |      | Marmoset     |

Irs3:1

|       |                                                                          |      |      |      |      |              |
|-------|--------------------------------------------------------------------------|------|------|------|------|--------------|
|       | 9503                                                                     | 9513 | 9523 | 9533 | 9543 |              |
| 9494: | GCCACCTGCGAAAGCAGAAGTCCCAGCGCCGCCGCTTCTTCGCCCTGCGC                       |      |      |      |      | Mouse_lemur  |
| 9124: | A . . . . . G . . . . A . . . . TA . T . . . . . C . T . . . . A . . . . |      |      |      |      | Bushbaby     |
| 9410: | -----                                                                    |      |      |      |      | Human        |
| 9410: | -----                                                                    |      |      |      |      | Chimpanzee   |
| 8910: | -----                                                                    |      |      |      |      | Gorilla      |
| 9411: | -----                                                                    |      |      |      |      | Orangutan    |
| 8939: | . . . . . T . . . . .                                                    |      |      |      |      | Gibbon       |
| 9491: | -----                                                                    |      |      |      |      | Macaque      |
| 9466: | -----                                                                    |      |      |      |      | Olive_Baboon |
| 8940: | . . . . . T . . . . .                                                    |      |      |      |      | Sq_monkey    |
| 9367: | . . . . . T . . . . .                                                    |      |      |      |      | Marmoset     |

Irs3:1

----->

|       |               |                           |                             |                     |                       |
|-------|---------------|---------------------------|-----------------------------|---------------------|-----------------------|
|       | 9553          | 9563                      | 9573                        | 9580                |                       |
|       | ↓             | ↓                         | ↓                           | ↓                   |                       |
| 9544: | ACCGACCC      | CGCGCCT                   | CGAGTGT                     | TATGAGAGCGA         | -----GA               |
| 9174: | . . . A . . . | G . A . . .               | A . . . A . . .             | A . . . . . . . . . | A . TGGCCCGGCGCAA . . |
| 9421: | G . A . . . . | G . . . . T . C . . . . . | . . . . . CC . . . . .      | . . . . .           | ----- . C             |
| 9421: | G . A . . . . | G . . . . T . C . . . . . | . . . . . CC . . . . .      | . . . . .           | ----- . C             |
| 8921: | G . A . . . . | G . . . . T . C . . . . . | . . . . . CC . . . . .      | . . . . .           | ----- . C             |
| 9422: | G . A . . . . | G . . . . T . C . . . . . | . . . . . CCC . . . . .     | . . . . .           | -----                 |
| 8950: | G . A . . . . | G . . . . T . C . . . . . | . . . . . CCA . A . . . . . | . . . . .           | ----- . C             |
| 9502: | G . A . . . . | G . . . . T . C . . . . . | . . . . . C . C . . . . .   | . . . . .           | -----TC               |
| 9477: | G . A . . . . | G . . . . T . C . . . . . | . . . . . C . C . . . . .   | . . . . .           | -----TC               |
| 8951: | . . A . . . . | GG . . . .                | T . C . . . .               | A . . CC . . . . .  | ----- . C             |
| 9378: | . . A . . . . | AAG . . . .               | T . C . . . .               | A . . CCT . . . . . | ----- . C             |

Mouse\_lemur  
 Bushbaby  
 Human  
 Chimpanzee  
 Gorilla  
 Oranguatan  
 Gibbon  
 Macaque  
 Olive\_Baboon  
 Sq\_monkey  
 Marmoset

Irs3:1

----->

|       |                 |              |                  |                |                   |                                       |
|-------|-----------------|--------------|------------------|----------------|-------------------|---------------------------------------|
|       | 9590            | 9600         | 9610             | 9620           | 9630              |                                       |
|       | ↓               | ↓            | ↓                | ↓              | ↓                 |                                       |
| 9581: | AGCAGTTC        | CGCGGTG      | GCCCAAG          | CGCGGCC        | CAGCGCAG          | CGTGAGCCTGGTG                         |
| 9224: | . . T . T . . . | G . . . .    | CCA . G . .      | AA . A . . . . | T . . . .         | CA . . . . A . . C . CA               |
| 9458: | . . A . . . .   | T . . . .    | CGT . . . .      | G . . . .      | T . . . .         | . . . . . C . . . . . C .             |
| 9458: | . . A . . . .   | T . . . .    | CGT . . . .      | G . . . .      | C . . . .         | . . . . . A . . . . . C . . . . . C . |
| 8958: | . . A . . . .   | T . . . .    | ACGT . . . .     | G . . . .      | . . . . .         | . . . . . G . C . T . . . . . C .     |
| 9457: | . . A . . . .   | T . . . .    | CGT . . . .      | G . . . .      | . . . . .         | . . . . . C . . . . . C . . . . . C . |
| 8987: | . . A . . . .   | T . . . .    | CG . . . .       | G . . . .      | A . . . .         | ----- . C . . . . . C .               |
| 9539: | . . A . . . .   | T . . . .    | G . CG . . . .   | GG . A . . . . | . . . . .         | T . . . . C . A . . . . . C .         |
| 9514: | . . A . . . .   | T . . . .    | G . CG . . . .   | AG . . . .     | G . . . .         | T . . . . C . A . . . . . C .         |
| 8988: | . . A . . C .   | A . A . .    | TGTT . G . . . . | . . . . .      | T . . . .         | . . . . . C . . . . . C . . . . . C . |
| 9415: | . . - - - - -   | TCA . TGTT . | G . . . . .      | . . . . .      | T . G . G . . . . | . . . . . C . . . . . C . . . . . C . |

Mouse\_lemur  
 Bushbaby  
 Human  
 Chimpanzee  
 Gorilla  
 Oranguatan  
 Gibbon  
 Macaque  
 Olive\_Baboon  
 Sq\_monkey  
 Marmoset

Irs3:1

----->

|       |                 |           |                 |             |                         |                         |
|-------|-----------------|-----------|-----------------|-------------|-------------------------|-------------------------|
|       | 9640            | 9650      | 9660            | 9670        | 9680                    |                         |
|       | ↓               | ↓         | ↓               | ↓           | ↓                       |                         |
| 9631: | GGCGCGT         | GCAACCAT  | CAGCAAG         | CGCGCGG     | ACGCGCC                 | AGCCACCTGAT             |
| 9274: | A . . . .       | T . . . . | A . . . .       | . . . . .   | . . . . .               | . . . . . G . . . . .   |
| 9508: | . . T . . . . . | . . . . . | C . . . . .     | T . . . . . | A . . T . . . . .       | . . . . . A . . . . .   |
| 9508: | . . T . . . . . | . . . . . | C . . . . .     | T . . . . . | A . . . . .             | . . . . . A . . . . .   |
| 9008: | . . T . . . . . | . . . . . | C . . . . .     | T . . . . . | A . . . . .             | . . . . . A . . . . .   |
| 9506: | . . . . .       | . . . . . | C . . . . .     | T . . . . . | A . . . . .             | . . . . . A . . . . .   |
| 9026: | . . . . .       | . . . . . | C . . . . .     | T . . . . . | A . . . . .             | . . . . . A . . . . .   |
| 9589: | . . . . .       | . . . . . | - - - - -       | A . . . . . | A . . . . .             | - - . . . . A . . . . . |
| 9564: | . . . . .       | . . . . . | . . . . .       | A . . . . . | A . . . . .             | - - . . . . A . . . . . |
| 9038: | . . . . .       | . . . . . | T . C . . . . . | T . . . . . | A . . T . . A . . . . . | . . . . . G . G . . . . |
| 9460: | . . . . .       | . . . . . | T . C . . . . . | T . . . . . | A . . T . . A . . . . . | . . . . . G . . . . .   |

Mouse\_lemur  
 Bushbaby  
 Human  
 Chimpanzee  
 Gorilla  
 Oranguatan  
 Gibbon  
 Macaque  
 Olive\_Baboon  
 Sq\_monkey  
 Marmoset

Irs3:1

----->

|       |               |              |               |             |                       |                                     |
|-------|---------------|--------------|---------------|-------------|-----------------------|-------------------------------------|
|       | 9689          | 9699         | 9709          | 9719        | 9729                  |                                     |
|       | ↓             | ↓            | ↓             | ↓           | ↓                     |                                     |
| 9681: | CGTCCTG-      | TACACG       | CGCGAC        | CAGCAGC     | CTGGGCGT              | GGCGGCCGCGCCAGCGAA                  |
| 9301: | . . . . .     | CT . . . . . | T . . . . .   | . . . . .   | G . . . .             | A . . . . A . . . . . T . . . . .   |
| 9558: | . . . . .     | C - . . . .  | C . . . . .   | . . . . .   | C . . . . .           | . . . . . AG . . . . G . . . . .    |
| 9558: | . . . . .     | C - . . . .  | C . . . . .   | . . . . .   | C . . . . .           | . . . . . AG . . . . G . . . . .    |
| 9058: | . . . . .     | C - . . . .  | C . . . . .   | . . . . .   | C . . . . .           | . . . . . AG . . . . G . . . . .    |
| 9556: | . . C . . . . | C - . . . .  | C . . . . .   | . . . . .   | C . . . . .           | . . . . . AG . . . . G . . . . .    |
| 9076: | . . . . .     | C - . . . .  | CT . . . . .  | A . . . . . | C . . . . .           | T . . . . AG . . . . G . . . . .    |
| 9629: | . C . . . .   | C - . . . .  | C . A . . . . | A . . . . . | C . . . . .           | . . . . . AG . . . . G . . . . .    |
| 9612: | . C . . . .   | C - . . . .  | C . A . . . . | A . . . . . | C . . . . .           | . . . . . AG . . . . G . . . . .    |
| 9088: | . . . . .     | - - - - -    | . . . . .     | C . . . . . | T . . . .             | A . . T . . A . . . . . G . . . . . |
| 9510: | . . . . .     | C - . . . .  | C . . . . .   | A . . . . . | T . T . . A . . . . . | A . . . . C . G . . . . .           |

Mouse\_lemur  
 Bushbaby  
 Human  
 Chimpanzee  
 Gorilla  
 Oranguatan  
 Gibbon  
 Macaque  
 Olive\_Baboon  
 Sq\_monkey  
 Marmoset

Irs3:1

|       |                                                     |      |      |      |      |                     |
|-------|-----------------------------------------------------|------|------|------|------|---------------------|
|       | 9739                                                | 9749 | 9759 | 9769 | 9779 |                     |
|       | ↓                                                   | ↓    | ↓    | ↓    | ↓    |                     |
| 9730: | GCGGAGCAGCAGGCCGTGGTACTGCGCCCTGCTCGAGGTGCGCGCCGCGGC |      |      |      |      | <b>Mouse_lemur</b>  |
| 9351: | .....TT.T.....AC...A.....A...T...C.T.....CA.        |      |      |      |      | <b>Bushbaby</b>     |
| 9607: | .....A...AA.A.....A.....GT.AT..                     |      |      |      |      | <b>Human</b>        |
| 9607: | .....A...AA.A.....A.....GT.AT..                     |      |      |      |      | <b>Chimpanzee</b>   |
| 9107: | .....A...AA.A.....A.....GT.AT..                     |      |      |      |      | <b>Gorilla</b>      |
| 9605: | .....A...AA.....A.....GT..C..                       |      |      |      |      | <b>Orangutan</b>    |
| 9125: | .....A...AA.....G.A.....GT..C..                     |      |      |      |      | <b>Gibbon</b>       |
| 9678: | .....A...AA.....C.....GT..C..                       |      |      |      |      | <b>Macaque</b>      |
| 9661: | .....A...AA.....C.....GT..C..                       |      |      |      |      | <b>Olive_Baboon</b> |
| 9134: | .....G.....AA.....CA.TA.G...C..                     |      |      |      |      | <b>Sq_monkey</b>    |
| 9559: | ..-...G.....C.AA..T.....CG..CA.TA.G...C..           |      |      |      |      | <b>Marmoset</b>     |

Irs3:1

|       |                                                    |      |      |      |                     |
|-------|----------------------------------------------------|------|------|------|---------------------|
|       | 9789                                               | 9799 | 9809 | 9816 |                     |
|       | ↓                                                  | ↓    | ↓    | ↓    |                     |
| 9780: | TGGTGAGGCCCGAGCCCTGGGCTGCAAGGGG---CTGGGGGGATCGTGG- |      |      |      | <b>Mouse_lemur</b>  |
| 9401: | CT.....C.....G.....---TCA...A..C...A.G             |      |      |      | <b>Bushbaby</b>     |
| 9657: | C.....C.....T.CG.....--C..C.....C.TC...C           |      |      |      | <b>Human</b>        |
| 9657: | C.....C.....T.CG.....--C..C.....C.TC...C           |      |      |      | <b>Chimpanzee</b>   |
| 9157: | C.....C.....T.CG.....--C..C.....C.TC...C           |      |      |      | <b>Gorilla</b>      |
| 9655: | C..C..A.....C.....T.CG.....--C.CC.....C.TC...C     |      |      |      | <b>Orangutan</b>    |
| 9175: | C.....CA...T.CG.....--C.CC.....C.T...C             |      |      |      | <b>Gibbon</b>       |
| 9728: | C-----T...CG...A--C.CC.....C.T...C                 |      |      |      | <b>Macaque</b>      |
| 9711: | C-----T...CG...A--C.CT.....C.T...C                 |      |      |      | <b>Olive_Baboon</b> |
| 9184: | CA.....G.....TG.....C..A.C--CTCC...C.C.T...C       |      |      |      | <b>Sq_monkey</b>    |
| 9608: | CA.....-..T..C.....CGA...GCC.CC.....C.T...C        |      |      |      | <b>Marmoset</b>     |

|       |                                               |      |      |      |                     |
|-------|-----------------------------------------------|------|------|------|---------------------|
|       | 9834                                          | 9843 | 9852 | 9862 |                     |
|       | ↓                                             | ↓    | ↓    | ↓    |                     |
| 9826: | -GGGGTTTATCTGTAG-----CCCAGGTCA-CGAAAATTCAAAC  |      |      |      | <b>Mouse_lemur</b>  |
| 9441: | TTT.....TCC...CCTGTCTCTCCT.....CT...G.....    |      |      |      | <b>Bushbaby</b>     |
| 9705: | T.T....C..C..G.CTCGCCCCCTCC.....GC.....G..... |      |      |      | <b>Human</b>        |
| 9705: | T.T....C..C..G.CTCGCCCCCTCC.....GC.....G..... |      |      |      | <b>Chimpanzee</b>   |
| 9205: | T.T....C..C..G.CTCGCCCCCTCC.....GC.....G..... |      |      |      | <b>Gorilla</b>      |
| 9703: | T.T....C..C..G.CTCGCCCCCTCC.....GC.....G..... |      |      |      | <b>Orangutan</b>    |
| 9223: | T.T....C..C..G.CTCGCCCCCTCC.....GC.....G..... |      |      |      | <b>Gibbon</b>       |
| 9767: | T.T....C..C..G.CTCGCCCCCTGC.....C.....G.....  |      |      |      | <b>Macaque</b>      |
| 9749: | T.T....C..C..G.CTCGCCCCCTGC.....C.....G.....  |      |      |      | <b>Olive_Baboon</b> |
| 9232: | T.T....C...AG.CTCGCCCCCTCC.....C.....G.....   |      |      |      | <b>Sq_monkey</b>    |
| 9657: | T.T....T..C..G.ATCGCCCCCTCC.....C.....G.....  |      |      |      | <b>Marmoset</b>     |

|       |                                                    |      |      |      |      |                     |
|-------|----------------------------------------------------|------|------|------|------|---------------------|
|       | 9871                                               | 9881 | 9891 | 9897 | 9907 |                     |
|       | ↓                                                  | ↓    | ↓    | ↓    | ↓    |                     |
| 9863: | ATT-AAGTGTTTACCTGTCTTCAGCTCTCT-GG-GCA--GTGATTGTAAC |      |      |      |      | <b>Mouse_lemur</b>  |
| 9491: | ...A..-CA..C..AA.....A...G.TA-...CAA...C.C....     |      |      |      |      | <b>Bushbaby</b>     |
| 9755: | ...A...G.---G.AG..T.AG..T...C-...-..               |      |      |      |      | <b>Human</b>        |
| 9755: | ...A...G.---G.AG..T.AG..T...C-...-..               |      |      |      |      | <b>Chimpanzee</b>   |
| 9255: | ...A...G...G.AG..T.AG..T...C...C..G--...GC.        |      |      |      |      | <b>Gorilla</b>      |
| 9753: | ...A...G...G.AG..T.AG..T...C-C-...-..              |      |      |      |      | <b>Orangutan</b>    |
| 9273: | ...A...G...G.AG..T.AG..T...C-...-..                |      |      |      |      | <b>Gibbon</b>       |
| 9817: | ...A...G...G.A...T.AG..T...C-...-..                |      |      |      |      | <b>Macaque</b>      |
| 9799: | ...A...G...G.A...T.AG..T...C-...-..                |      |      |      |      | <b>Olive_Baboon</b> |
| 9282: | ...A...GA...G.AG..T.AG..T....                      |      |      |      |      | <b>Sq_monkey</b>    |
| 9707: | ...A...G...G.AG..T.AG..T...CT...-..                |      |      |      |      | <b>Marmoset</b>     |

Irs3:2  
→

9917            9927            9937            9947            9957

9908: CTCCCGGGCCAGGAGCGCTTTGTGACCAGCCCATTTGTCTCCCTAGGACCC  
9538: ...T...T...G.TGC.C.C.....A.....AA....C.A.T.A.

**Mouse\_lemur**  
**Bushbaby**

Irs3:2  
→

9967            9977            9987            9997            10007

9958: AGCTCCTACGAGGACCCTGGGACCTGGATCCTCTCTCCGTTCCAGGACGT  
9588: ..T..-----..AC...T...-...A.....  
9580: .....G.....TG..  
10007: .....G.....TG..

**Mouse\_lemur**  
**Bushbaby**  
**Sq\_monkey**  
**Marmoset**

Irs3:2  
→

10017            10027            10037            10047            10057

10008: CTGGCCCGTGACGCTGCGGCCCAAAGGGCTGGGGCGGACCCGAGGCCTGG  
9619: ....T.T.....AT.....T.....A.....T.....  
9607: ....T.C.....GTT.....  
10034: ....T.C.....GTT....C..G.....A.

**Mouse\_lemur**  
**Bushbaby**  
**Sq\_monkey**  
**Marmoset**

Irs3:2  
→

10067            10077            10087            10097            10107

10058: GCAGCGGCGGCTACCGCTTGTGCCTGGGTTTCGGGGGCTCTGAGTCTGCTG  
9669: ....T..T.....TT.CC.....C.....C.....A  
9640: ----T.....C.....T.....  
10084: .---A.....A.C...A.T....-----

**Mouse\_lemur**  
**Bushbaby**  
**Sq\_monkey**  
**Marmoset**

Irs3:2  
→

10117            10127            10137            10147            10157

10108: CGGAAGCCCAGGGGCGAGGGCTTCCGGGATAACCGGGCATTGCCGCCGCC  
9719: T.....CA.A.T..-...G.A...C.C.GA....CA...A...  
9664: -----T.CAC....A..T.C..T....  
10109: -----T.C.....A..T.C..T....

**Mouse\_lemur**  
**Bushbaby**  
**Sq\_monkey**  
**Marmoset**

Irs3:2  
→

10167            10177            10187            10197            10207

10158: CGCCCTGCGCCTGCCCTGCTCAGCGTGCGCCGCTGCGGCCACGCAGACT  
9768: T.....TA..G.....A.G.T...C...T.....  
9688: -...G..A.....T.A...GG....A....AGG...  
10133: -.....A.....T.A...T.....C...G.-

**Mouse\_lemur**  
**Bushbaby**  
**Sq\_monkey**  
**Marmoset**

Irs3:2  
→

10217            10227            10237            10247            10257

10208: CTTTCTTCTTCCTGGAGCTCGGCCGCTCGGCACCCACGGGTCCCGGGGAG  
9818: ..----.....T..T...T..G.TTG..T.T.T..A.T.....  
9737: G.C--.....TT.....G.....  
10181: -----T.....T.....T...A....-G.----A.....

**Mouse\_lemur**  
**Bushbaby**  
**Sq\_monkey**  
**Marmoset**



## Irs3:2

|        |                                                   |       |       |       |       |              |
|--------|---------------------------------------------------|-------|-------|-------|-------|--------------|
|        | 10491                                             | 10501 | 10511 | 10521 | 10531 |              |
|        | ↓                                                 | ↓     | ↓     | ↓     | ↓     |              |
| 10482: | GATCAAGCAAGCAACCCTTGGGACCCCGCGAGGCTAGGGGCGGCAGCCT |       |       |       |       | Mouse_lemur  |
| 10049: | ...C...A...T..CA..GA...AA...A...A..T.T...T.       |       |       |       |       | Bushbaby     |
| 10249: | ...G.....G.....AA...TTG.....G...A.A.....          |       |       |       |       | Human        |
| 10232: | ...G.....G.....AA...TTG.....G...A.A.....          |       |       |       |       | Chimpanzee   |
| 9737:  | ...G.....G.....AA...TTG.....G...A.....            |       |       |       |       | Gorilla      |
| 10220: | .....G.....AA...TTG.....G...A.....T.              |       |       |       |       | Oranguatan   |
| 9738:  | ...G.T.....G.....AA...TTG.....G...A.....          |       |       |       |       | Gibbon       |
| 10281: | ...                                               |       |       |       |       | Olive_Baboon |
| 10286: | .....G....CAA...TTG..A.....G..T..A.....           |       |       |       |       | Olive_Baboon |
| 10003: | A.C.C.....GT...GAA..T.TTG..A.A...GT.A.G...A...    |       |       |       |       | Sq_monkey    |
| 10465: | A.C.C.....T.GT...GAA..T..T-..A.A...G..A.G..T.A... |       |       |       |       | Marmoset     |

## Irs3:2

|        |                                                    |       |       |       |       |              |
|--------|----------------------------------------------------|-------|-------|-------|-------|--------------|
|        | 10541                                              | 10551 | 10561 | 10571 | 10581 |              |
|        | ↓                                                  | ↓     | ↓     | ↓     | ↓     |              |
| 10532: | TGCACCTCTAAGGCGCTGGATCAGGGGGGAGCTACATAAACATGGGAGCC |       |       |       |       | Mouse_lemur  |
| 10099: | ...G.....G.A....-TC..CT...GAG.G.....-----          |       |       |       |       | Bushbaby     |
| 10299: | .CT..C.....G.-----T..T..G.....C..A.....A           |       |       |       |       | Human        |
| 10282: | .CT..C.....G.-----G..T..G.....C..A.....A           |       |       |       |       | Chimpanzee   |
| 9787:  | .CT..C.C...G.-----G..T..G.....C..A.....A           |       |       |       |       | Gorilla      |
| 10270: | CCT..C.C..T.G.-----G..T..G.....C..A.....G          |       |       |       |       | Oranguatan   |
| 9788:  | CCT..C.C...G.-----G..AT..G.....C..A.....TG         |       |       |       |       | Gibbon       |
| 10331: | CCT..C.C...G.-----T..G.....C..A.....TG             |       |       |       |       | Olive_Baboon |
| 10053: | ..T..C.C...G.-----G..T..G.....C..A.....TG          |       |       |       |       | Sq_monkey    |
| 10514: | ..T..C.CG...G.-----TG..T..G.....C..A.....TG        |       |       |       |       | Marmoset     |

## Irs3:2

|        |                                                  |       |       |       |       |              |
|--------|--------------------------------------------------|-------|-------|-------|-------|--------------|
|        | 10591                                            | 10601 | 10611 | 10621 | 10631 |              |
|        | ↓                                                | ↓     | ↓     | ↓     | ↓     |              |
| 10582: | GGGAGTGACTACGAGCCCATGGGGGGCGGCAGCGGGCGGCTACACGGT |       |       |       |       | Mouse_lemur  |
| 10144: | -----C.....A.T.....A.A...GTA..                   |       |       |       |       | Bushbaby     |
| 10343: | .....T.....                                      |       |       |       |       | Human        |
| 10326: | ..C.....                                         |       |       |       |       | Chimpanzee   |
| 9831:  | .....A.....                                      |       |       |       |       | Gorilla      |
| 10314: | .....                                            |       |       |       |       | Oranguatan   |
| 9832:  | .....C.....                                      |       |       |       |       | Gibbon       |
| 10375: | .....                                            |       |       |       |       | Olive_Baboon |
| 10097: | ..T.....A.....CA..                               |       |       |       |       | Sq_monkey    |
| 10558: | ..T.....A.....A..                                |       |       |       |       | Marmoset     |

## Irs3:2

|        |                                               |       |       |             |
|--------|-----------------------------------------------|-------|-------|-------------|
|        | 10641                                         | 10651 | 10669 |             |
|        | ↓                                             | ↓     | ↓     |             |
| 10632: | GATGGCGTCCCAGGCCTTTGTCCGGCCA-----CTCCTGCTC    |       |       | Mouse_lemur |
| 10181: | ...A..T.....A-.....A....CCTCCAGCGCCG....C.... |       |       | Bushbaby    |

## Irs3:2

|        |                                    |       |       |              |
|--------|------------------------------------|-------|-------|--------------|
|        | 10679                              | 10689 | 10697 |              |
|        | ↓                                  | ↓     | ↓     |              |
| 10670: | CTGGCCAACCTCTCCAGGAC-----TGGGGGGA  |       |       | Mouse_lemur  |
| 10230: | TCCA...GT.G..T....T-----A-         |       |       | Bushbaby     |
| 10345: | ...GTGGGGGCTACATAACCAAGGGAG....A.- |       |       | Olive_Baboon |

Irs3:2

10707 10716 10726 10736 10746  
 10698: CACCGAATACGTGCCC-ATGAACCGCTTTCCGCCAGGGTCCTTTTCCTTG  
 10257: . . . . A . . . . TA . . . . A . . . . G . TT . . . . C . . T . . . . . . . . . . . . . . . . T . C .  
 10380: ---T . . C . . . . A . . . . - . . . . G-----

Mouse\_lemur  
 Bushbaby  
 Olive\_Baboon

Irs3:2

10756 10766 10776 10786 10796  
 10747: AGCTCGCTGCACCACTCCTACAAGTCCGGAGCTGGGAAGCCTGGACCCGG  
 10307: . . . . C . . . . C . . GT . . . . . . . . . . T . . ----- . . T . .  
 10359: . . . . T . . . . . . . . . . T . . - T . CA . G . . . . . . . . . . A . A .  
 10342: . . . . T . . . . . . . . . . T . . - T . CA . G . . . . . . . . . . A . A .  
 9847: . . . . T . . . . . . . . . . T . . - T . CA . G . . . . . . . . . . A . A .  
 10330: . . . . T . . . . . G . . . . . . . . . . - T . CA . G . . . . . . . . . . A . A .  
 9848: . . . . T . . . . . . . . . . . . . . . . - T . CA . G . . . . . . . . . . A . A .  
 10397: ----- . G . . . . T . . . . . . . . . . T . . - . . CA . G . . . . . . . . . . A .  
 10121: . . T . TC . . . . . . . . . . . . . . . . A - T . . . . G . . TT . . . . . . . . A .  
 10582: . . T . TC . . . . . . . . . . . . . . . . A - T . . . . G . . TT . . . . . . . . A .

Mouse\_lemur  
 Bushbaby  
 Human  
 Chimpanzee  
 Gorilla  
 Oranguatan  
 Gibbon  
 Olive\_Baboon  
 Sq\_monkey  
 Marmoset

Irs3:2

10806  
 10797: GCTCCGGAGC-----  
 10342: . . . . . AG . G-----  
 10397: . . C . A . . . . T-----  
 10380: . . C . A . . . . T-----  
 9885: . . C . A . . . . T-----  
 10368: . . C . A . . . . T-----  
 9886: . . C . A . . . . T-----  
 10438: . . CAA . . . . -----  
 10160: . . C . A . . G . .-----  
 10621: . . C . A . . G . TACCCATCGTGGTGTGGGGGGTGGTTGGGGATGGGCAGGGG

Mouse\_lemur  
 Bushbaby  
 Human  
 Chimpanzee  
 Gorilla  
 Oranguatan  
 Gibbon  
 Olive\_Baboon  
 Sq\_monkey  
 Marmoset

Irs3:2

10815 10825 10835 10845 10855  
 10807: -GCCCATCGCAGCGCTGGGGGCAGCTGGGGACTGCCAAGGGCTCAGCCCT  
 10352: - . . . . . T . . T . . A . . T . . . . . . . . . . CATT . GA . . . . G . . . . T .  
 10407: - . . . . . GAT . TG . . . . CTG . . . . . . . . . . TG . GT . G . . A . . . . . G . .  
 10390: - . . . . . GAT . TG . . . . CTG . . . . . . . . . . TG . GT . G . . A . . . . . G . .  
 9895: - . . . . . AT . TG----- . . . . . TG . GT . G . . A . . . . . G . .  
 10378: - . . . . . ATGAT . TG . . . . CTG . . . . . . . . . . G . GT . G . . A . . . . . G . .  
 9896: - . . . . . GAT . TG . . . . CTG . . . . . . . . . . G . GT . G . . A . . . . . GG . .  
 10448: - . . . . . A . GAT . TG . . . . CTG . . . . . . . . . . G . GT . G . . . . . . . . G . .  
 10170: - . . . . . TGAT . A . . . . TG . . . . . . . . . . G . GTGG . . . . . . . . A . .  
 10671: C . . . . . TG . T . TG . . . . TG . . . . . . . . . . TG . G . . G . . . . . . . . A . .

Mouse\_lemur  
 Bushbaby  
 Human  
 Chimpanzee  
 Gorilla  
 Oranguatan  
 Gibbon  
 Olive\_Baboon  
 Sq\_monkey  
 Marmoset

## Irs3:2

|        | 10864   | 10874                                   | 10884           | 10893 | 10903 |                     |
|--------|---------|-----------------------------------------|-----------------|-------|-------|---------------------|
| 10856: | GTTCCC  | -TGTCGCCGTCCGAGCTGGCCGGGAAGC-           | ACGTGTACACCGAGT |       |       | <b>Mouse_lemur</b>  |
| 10401: | .....TC | C...G...G...T...GA.....T-.AC..G..TGT... |                 |       |       | <b>Bushbaby</b>     |
| 10456: | .C...-- | .C.C..C..A.....TA..G..TG.A...G...A...   |                 |       |       | <b>Human</b>        |
| 10439: | .C...-- | .C.C..C..A.....TA..G..TG.A...G...A...   |                 |       |       | <b>Chimpanzee</b>   |
| 9934:  | .C...-- | .C.C..C..A.....T..G..TG.A...G...A...    |                 |       |       | <b>Gorilla</b>      |
| 10427: | .C...-- | .CAC..C..A.....T..G..TG.A...G...A...    |                 |       |       | <b>Oranguatan</b>   |
| 9945:  | .C...-- | .C.C..C..A.....T..G..TG.A...G...A...    |                 |       |       | <b>Gibbon</b>       |
| 10497: | .C...-- | .G.C..C..G.....T..G..G-.A...G..T.A...   |                 |       |       | <b>Olive_Baboon</b> |
| 10219: | .C...-- | .A..C.GC.T.....T..G..TT.A...G..T.A.A.   |                 |       |       | <b>Sq_monkey</b>    |
| 10721: | .C...-- | .C.C..C.TGC.....T..G..TT.A...G..CT.A... |                 |       |       | <b>Marmoset</b>     |

## Irs3:2

|        | 10913                                              | 10923 | 10941 | 10951 |                     |
|--------|----------------------------------------------------|-------|-------|-------|---------------------|
| 10904: | ACGCGGCCCCAAACTGCGTAGGAATAGCT--TCTGCCGGGCCAGAGCCCC |       |       |       | <b>Mouse_lemur</b>  |
| 10450: | ..CA.....GG...AG...GTATTGCCGA.....A..G...GT..      |       |       |       | <b>Bushbaby</b>     |
| 10504: | TAT.....G.GA..C.C...CC.GC--A.C..A.....             |       |       |       | <b>Human</b>        |
| 10487: | TAT.C.....G.GA..C.C...C..GC--A.C..A.....           |       |       |       | <b>Chimpanzee</b>   |
| 9982:  | TAT.....G.GA..C.C...C..GC--A.CA..A.....            |       |       |       | <b>Gorilla</b>      |
| 10475: | TAT.....G.GA..C.CA..C..GC--A.C..A.....T            |       |       |       | <b>Oranguatan</b>   |
| 9993:  | TAT.....GCGA..C.CA..C..GC--A.C..A.T.....           |       |       |       | <b>Gibbon</b>       |
| 10544: | TAC.....-G.GA..C.CCA..C..TC--A.C..A.....           |       |       |       | <b>Olive_Baboon</b> |
| 10267: | TT..A.....GG.GA..C.G...C.TG.--A.CA..A..TG.....     |       |       |       | <b>Sq_monkey</b>    |
| 10769: | TT..A..T..G.GA..C.G...C.TGC--A.CA..A..TG.....      |       |       |       | <b>Marmoset</b>     |

## Irs3:2

|        | 10961                                                | 10971 | 10981 | 10991 | 11001 |                     |
|--------|------------------------------------------------------|-------|-------|-------|-------|---------------------|
| 10952: | CAGACGGCCATCTCAACTACGTTCGACTTGGACCTGGTCCCCTCCTCTGGAG |       |       |       |       | <b>Mouse_lemur</b>  |
| 10500: | .....A..TGC...T.....-----T.....G...T...T...          |       |       |       |       | <b>Bushbaby</b>     |
| 10552: | TGACGA..TGC...G.....TC.....T.T...G.                  |       |       |       |       | <b>Human</b>        |
| 10535: | TGACGA..TGC...G.....TC.....T.T...G.                  |       |       |       |       | <b>Chimpanzee</b>   |
| 10030: | TGACGA..TGC...G.....TC.....T.T...G.                  |       |       |       |       | <b>Gorilla</b>      |
| 10518: | GTTCGA..TGC...G.....-C.....T.T...G.                  |       |       |       |       | <b>Oranguatan</b>   |
| 10041: | TGACAA..TGC...G...T..T..TC.....T.T.T...G.            |       |       |       |       | <b>Gibbon</b>       |
| 10590: | TGACGA..TGC...G...T..T..C.....T.T...G.               |       |       |       |       | <b>Olive_Baboon</b> |
| 10315: | TGAC-A..TGC...GT...G...C.....T.T...G.                |       |       |       |       | <b>Sq_monkey</b>    |
| 10817: | TGAC-A..TGC...GT...G...C.....T.T...G.                |       |       |       |       | <b>Marmoset</b>     |

## Irs3:2

|        | 11011                                              | 11021 | 11030 | 11040 | 11050 |                     |
|--------|----------------------------------------------------|-------|-------|-------|-------|---------------------|
| 11002: | GCGCGCGGCGACGTCCCCGGGGTCC-GCAAGCTCCTCCCGCACAGCTACG |       |       |       |       | <b>Mouse_lemur</b>  |
| 10545: | .AA...A..TG...T.....GG-...T.....A..T..T...T        |       |       |       |       | <b>Bushbaby</b>     |
| 10602: | ..A.TT..T.....A..C.-A..C...G...A..T...T.           |       |       |       |       | <b>Human</b>        |
| 10585: | ..ATTT..T.....A..C.-...C...G...T...T.              |       |       |       |       | <b>Chimpanzee</b>   |
| 10080: | ..A.TT..T.....A..C.-...C...G...T...T.              |       |       |       |       | <b>Gorilla</b>      |
| 10564: | ..A.TT..A.....A..C.-...C...G...T...T.              |       |       |       |       | <b>Oranguatan</b>   |
| 10091: | ..A.TT..T.....A.....-...C...G...T...T.             |       |       |       |       | <b>Gibbon</b>       |
| 10640: | ..A.TT..T..T.....A..C.T-...C...G...GT...A          |       |       |       |       | <b>Olive_Baboon</b> |
| 10364: | ..A.T.T...A.....C..T.A.CA..TG..T.....A             |       |       |       |       | <b>Sq_monkey</b>    |
| 10866: | ..A.T.T...A...T...CCC.T-.A.CA..TGT.T.....T         |       |       |       |       | <b>Marmoset</b>     |



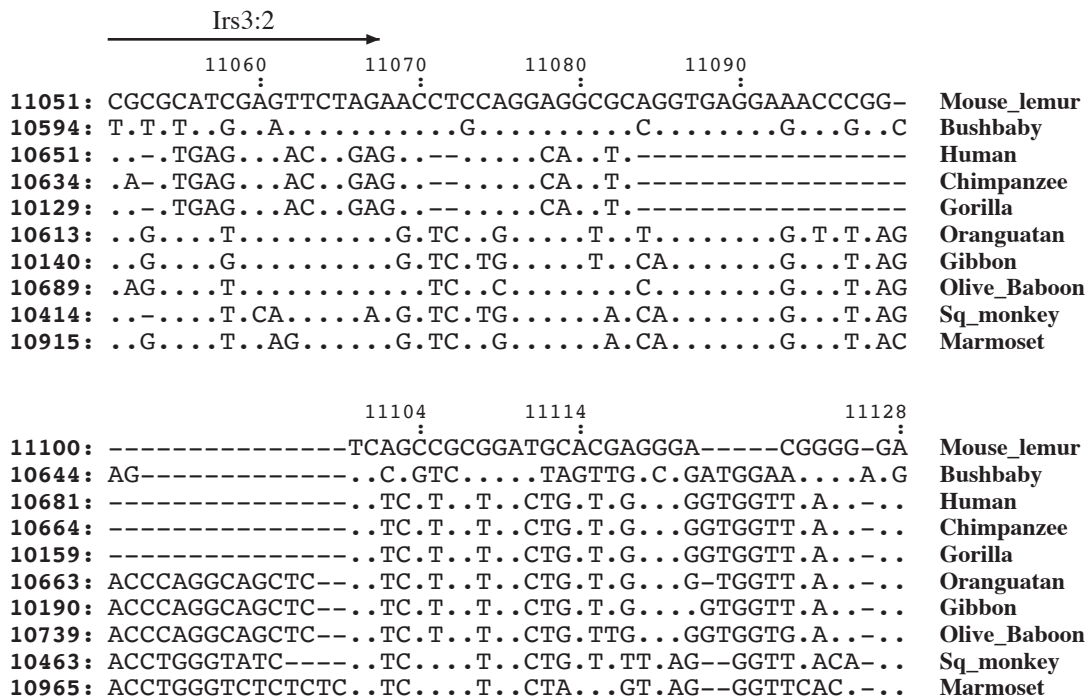

**Figure S7. Alignment of *Irs3* genomic sequences.** An alignment of *Irs3* genomic sequences from diverse primates was generated using MultiPipMaker [56,57]. Dots (.) in the alignment indicate bases identical to those in the top line, while dashes (-) are gaps introduced to maximize similarity. Blank spaces are regions that have no similarity to the mouse lemur (labeled Mouse\_lemur) that was used as the master sequence for the alignment. Annotation of the *Irs3* gene is shown above the alignment, based on alignment of the mouse lemur gene with those from other diverse mammals (results not shown). The arrows above the sequence represent the coding exons and are labeled Irs3:1 and Irs3:2 and starts from the initiator ATG and ends with the TAG termination codon. Sq\_monkey is squirrel monkey.
