# Supplementary material for: Evolution of the vertebrate insulin receptor substrate (Irs) gene family
Source: PubMed Central journal article supplement (PMC5482937; doi:10.1186/s12862-017-0994-z), 2017-06-23
Supplement: 12862_2017_994_MOESM12_ESM.pdf [file 12862_2017_994_MOESM12_ESM.pdf]

**PTB Domain**  
Mus\_mu1 SD--EFRFRS KSQSS--SCS NPISVPL--R RHHLNPNPPS QVGLTRRSRT E-SITATSPA SMVG--GKGF SFRVRSASDD EGTM--SR-----PAS VDGSVPVSPST NRTHAHRHRG SS----- --RLHP--P LN---HSRSI PMPSSRCSFP --SATSFP--  
Rat\_no1 SD--EFRFRS KSQSS--SCS NPISVPL--R RHHLNPNPPS QVGLTRRSRT E-SITATSPA SMVG--GKGF SFRVRSASDD EGTM--SR-----PAS VDGSVPVSPST NRTHAHRHRG SA----- --RLHP--P LN---HSRSI PMPSSRCSFP --SATSFP--  
Mes\_aul SD--EFRFRS KSQSS--SCS NPISVPL--R RHHLNPNPPS QVGLTRRSRT E-SITATSPA SMVG--GKGF SFRVRSASDD EGTM--SR-----PAS VDGSVPVSPST NRTHAHRHRG SS----- --RLHP--P LN---HSRSI PMPSSRCSFP --SATSFP--  
Mic\_oc1 SD--EFRFRS KSQSS--SCS NPISVPL--R RHHLNPNPPS QVGLTRRSRT E-SITATSPA SMVG--GKGF SFRVRSASDD EGTM--SR-----PAS VDGSVPVSPST NRTHAHRHRG SA----- --RLHP--P LN---HSRSI PMPSSRCSFP --SATSFP--  
Per\_ma1 SD--EFRFRS KSQSS--SCS NPISVPL--R RHHLNPNPPS QVGLTRRSRT E-SITATSPA SMVG--GKGF SFRVRSASDD EGTM--SR-----PAS VDGSVPVSPST NRTHAHRHRG SA----- --RLHP--P LN---HSRSI PMPSSRCSFP --SATSFP--  
Pro\_co1 SD--EFRFRS KSQSS--SCS NPISVPL--R RHHLNPNPPS QVGLTRRSRT E-SITATSPA SMVG--GKGF SFRVRSASDD EGTM--SR-----PAS VDGSVPVSPST NRTHAHRHRG SA----- --RLHP--P LN---HSRSI PMPSSRCSFP --SATSFP--  
Mic\_mu1 SD--EFRFRS KSQSS--SCS NPISVPL--R RHHLNPNPPS QVGLTRRSRT E-SITATSPA SMVG--GKGF SFRVRSASDD EGTM--SR-----PAS VDGSVPVSPST NRTHAHRHRG SA----- --RLHP--P LN---HSRSI PMPSSRCSFP --SATSFP--  
Ovi\_arm1 SD--EFRFRS KSQSS--SCS NPISVPL--R RHHLNPNPPS QVGLTRRSRT E-SITATSPA SMVG--GKGF SFRVRSASDD EGTM--SR-----PAS VDGSVPVSPST NRTHAHRHRG SA----- --RLHP--P LN---HSRSI PMPSSRCSFP --SATSFP--  
Orc\_or1 SD--EFRFRS KSQSS--SCS NPISVPL--R RHHLNPNPPS QVGLTRRSRT E-SITATSPA SMVG--GKGF SFRVRSASDD EGTM--SR-----PAS VDGSVPVSPST NRTHAHRHRG SS----- --RLHP--P LN---HSRSI PMPSSRCSFP --SATSFP--  
Xen\_tr1 SD--EFRFRS KSQSS--SCS NPISVPL--R RHHLNPNPPS QVGLTRRSRT E-SITATSPA SMVG--GKGF SFRVRSASDD EGTM--SR-----PAS VDGSVPVSPST NRTHAHRHRG SA----- --RLHP--P LN---HSRSI PMPSSRCSFP --SATSFP--  
Mus\_mu2 KELFEFRFRS KSQSSGSSAT HPISVFGARR HHHLVNLNPPS QTGLVRRSRT D-SLAATPPA AKC-----T SCRVRTASEG DGGG---AGG AGTAGGRPMS VAGSPLSFGF VRAPLRSRHT LSAGCGGRPS KVTLAPAGGA LQ---HSRSM SMPVAHSPFP --AATSFP--  
Rat\_no2 KELFEFRFRS KSQSSGSSAT HPISVFGARR HHHLVNLNPPS QTGLVRRSRT D-SLAATPPA AKC-----T SCRVRTASEG DGGG---AGG AGTAGGRPMS VAGSPLSFGF VRAPLRSRHT LSAGCGGRPS KVALAPAGGA LQ---HSRSM SMPVAHSPFP --AATSFP--  
Mes\_aul KELFEFRFRS KSQSSGSSAT HPISVFGARR HHHLVNLNPPS QTGLVRRSRT D-SLAATPPA AKC-----T SCRVRTASEG DGGG---AAG AGAAGGRPMS VAGSPLSFGF VRAPLRSRHT LSGCGGRPS KVTLAPAGGA LQ---HSRSM SMPVAHSPFP --AATSFP--  
Mic\_oc2 KELFEFRFRS KSQSSGSSAT HPISVFGARR HHHLVNLNPPS QTGLVRRSRT D-SLAATPPA AKC-----T SCRVRTASEG DGGG---AAG AGTAGGRPMS VAGSPLSFGF VRAPLRSRHT LSGCGGRPS KVTLAPAGGA LQ---HSRSM SMPVAHSPFP --AATSFP--  
Per\_ma2 KELFEFRFRS KSQSSGSSAT HPISVFGARR HHHLVNLNPPS QTGLVRRSRT D-SLAATPPA AKC-----T SCRVRTASEG DGGG---AAG AGTAGGRPMS VAGSPLSFGF VRAPLRSRHT LSAGCGGRPS KVTLAPAGGA LQ---HSRSM SMPVAHSPFP --AATSFP--  
Pro\_co2 KELFEFRFRS KSQSSGSSAT HPISVFGARR HHHLVNLNPPS QTGLVRRSRT D-SLAATPPA AKC-----T SCRVRTASEG DGGG---AAG TAGAGGRPVS VAGSPLSFGF VRAPLRSRHT LSGCGGRPS KVTLAPAGGA LQ---HSRSM SMPVAHSPFP --TATSFP--  
Mic\_mu2 KELFEFRFRS KSQSSGSSAT HPISVFGARR HHHLVNLNPPS QTGLVRRSRT D-SLAATPPA AKC-----N SCRVRTASEG DGGG---AAG TGAGGGRPS VAGSPLSFGF VRAPLRSRHT LSGCGGRPS KVTLAPAGGA LQ---HSRSM SMPVAHSPFP --TATSFP--  
Ovi\_arm2 KELFEFRFRS KSQSSGSSAT HPISVFGARR HHHLVNLNPPS QTGLVRRSRT D-SLAATPPA AKC-----S ACRVRTASEG DGGG---AAG AAGAAG---A AGSPLSFGF VRAPLRSRHT LS---GRRG KVALAPAGG LQ---HSRSM SMPVAHSPFP --AATSFP--  
Orc\_or2 KELFEFRFRS KSQSSGSSAT HPISVFGARR HHHLVNLNPPS QTGLVRRSRT D-SLAATPPA AKC-----S SCRVRTASEG DGGV---AAG AGAAGGRPVS VAGSPLSFGF VRAPLRSRHT LSGCGGRPS KVTLAPAGGA LQ---HSRSM SMPVAHSPFP --AATSFP--  
Xen\_tr2 RELVEFRFRS KSQSSSS---NPISVFG--R RHHLNQLNPPS QTGLTRRTRT D-----FPST SVCV--SANT SSRRTASEG DNLSS---NR---T VTGSPLSFSM LRAPLRSRHT LS---LCGRNT K--LVPFGP LQ---HSRSM SMPVFRSPFP --TAASFP--  
Mus\_mu3 GS-----NAA----- --GA EPPQGNPKP----- --SVPAA PTPPYEIP--ASAQA-----  
Rat\_no3 GS-----SAA----- --GA E-APLGDSPK----- --GASAV PAFAPYEIPA LALAQA-----  
Mes\_aul GS-----GAT----- --DEA E-PLSGDFPD----- --SASAA PAFVYEYETP--ASVTQP-----  
Mic\_oc3 GS-----SAA----- --GKD E-PPSANPFK----- --SASAA PPRVYEYETP--ASAAQP-----  
Per\_ma3 GS-----SGS----- --GKD E-PPGEPFK----- --SASAA PAFAPYEYETP--TSAAPQ-----  
Pro\_co3 GS-----GGG----- --GRA E-PLFRDPT----- --SASRL SVFQYETP--ASAQSS-----  
Mic\_mu3 GS-----GGV----- --ARA E-PLFRDCT----- --SASRL SVFQYETP--VSAQS-----  
Ovi\_arm3 GD-----SGAV----- --GRA E-PLFRKPT----- --GAFRP SVFQYETP--DSAAQT-----  
Orc\_or3 GS-----SGAG----- --GRA E-PLFRKPT----- --SASTP SVFQYETP--ASAQS-----  
Xen\_tr3 SE--EFRPRT KSQSSLS---TPISVPS--R RHHPNPPPPS QVGLSRRSRA E-T----- --P IENSVP----- --K P--HLSLK DY-----SVQSP-----

Mus\_mu4 CA-DEYRARC RSYSI-SIGA HLTLTLLS--T RRLHGLLPIE PGWLRYSRFL E----- --Q FCRLRAIRER -EEMLFTRFR ISPREPPPPF RRGGRHLFRA RR----- --SRRAA SVPPSLFRK-- --SAPSPG-R IPQEDVPND RAR---EASG SSSGNTEE--  
Rat\_no4 CA-DEYRARC RSYSI-SVGA HLTLTLLS--T RRLHGLLPIE PGWFRFRSFL E----- --Q FCHLRALICR -EDMLFTRFR IAPREPPPPF RRGGRHLFRA RR----- --SRRAV SVPPSFRK-- --SAPSPG-R IQPEDARNH RAC---QAQG SSSGNSEE--  
Mes\_aul CA-DEYRARC RSYSI-TVGA HLTLTLLS--T RRLHGLLPIE PGWLRYSRFL E----- --Q FCRLRVIGR EEMLFTRFR R-PSELPFP RRGGRHLFRA RR----- --SRRAV SVPPSFRK-- --LAFSPFVR VSHTEVSHN RAC---EASG SSSGNSEE--  
Mic\_oc4 CA-DEYRARC RSYSI-SIGA HLTLTLLS--T RRLHGLLPIE PGWFRFRSFL E----- --H LSHLRALISD -EEMLFTRFR K-PSELPFP RRGGRHLFRA RR----- --SRRAV SVPPSFRK-- --LAFSPFVR VSHTEVSHN RAC---EASG SSSGNSEE--  
Per\_ma4 CA-DEYRARC RSYSI-SVGA HLTLTLLS--T RRLHGLLPIE PGWLRYSRFL E----- --Q FCHLRALICR -EEMLFTRFR I-PNEPLFP RRGGRHLFRA RR----- --SRRAV SVPPSFRK-- --VAFSPRNV VSHTEVSHN RAC---EASG SSSGNSEE--  
Pro\_co4 CA-DEYRARC RSYSI-CIGA HLTLTLLS--T RRLHGLLPIE PGWLRYSRFL E----- --Q FYHRLALDGG EDEMLFSRHL LTPSEVPAS RRGGRHLFRA RR----- --SRRAL SVFACIFRRA-- --LSPF-VR APNTEAEPND GAGQSSA---SGSGNSGEG  
Mic\_mu4 CA-DEYRARC RSYSI-SIGA HLTLTLLS--T RRLHGLLPIE PGWFRFRSFL E----- --Q FYHRLALDGG EDEMLFSRHL VTRPEVPAS RRGGRHLFRA RR----- --SRRAL SVFACIFRRA-- --LSSST-VR APTAEPND GAGQSSA---SGSGNSGEG  
Ovi\_arm4 CA-DEYRARC RSYSI-SIGG HLTLTLLS--T RRLHGLLPIE PGWLRYSRFL E----- --Q FCHLRALDGG EDEMLFARY ITPSEVPAS RRGGRHLFRA RR----- --PRRAT SVFASFFRRA-- --TAPSP-VR ILYPAEALHD RDPVSSAEG SGSGNSGEG  
Orc\_or4 CA-DEYRARC RSYSI-SIGA HLTLTLLS--T RRLHGLLPIE PGWLRYSRFL E----- --Q FCHLRALDGG EDEMLFARY ITPSEVPAS RRGGRHLFRA RR----- --SRRAL SVFASFFRRA-- --VAFSP-VR GHPAEPSE GAGLSEAFSG SGSGNSGEG  
Xen\_tr4 KAYSEFRFRS KSQSSGT---NPISFIT--T RRYLGNLPPS QTGLQRRSRT E-SVVTGTPPS -----AKNN SFRFRTSSEG EGTM--TRF FR-----S VTGSLSHLNT ARINLKGQEG AG----- --RYRAP FNSGYHSRA SLPVSHFP-- --SATSFP-- GHPAEPSE GAGLSEAFSG SGSGNSGEG

#

Mus\_mu1 -----VSL SSSSTSGHGS TSDCLFP----- --RRS--SA SVSGSPSDGG FISSDEYSS PCDF-RS--S FRSVTPDSLGL HTTPAR--GE EELSNYICMG GKGASTLAP NGHYILSRGG NGHRYIPGAN LGTSPALFGD EAAGAADDN RFRKRTHSAG TS-PT---I  
Rat\_no1 -----VSL SSSSTSGHGS TSDCLFP----- --RRS--SA SVSGSPSDGG FISSDEYSS PCDF-RS--S FRSVTPDSLGL HTTPAR--GE EELSNYICMG GKGASTLAP NGHYILSRGG NGHRYIPGAN LGTSPALFGD EAAGAADDN RFRKRTHSAG TS-PT---I  
Mes\_aul -----VSL SSSSTSGHGS TSDCLFP----- --RRS--SA SVSGSPSDGG FISSDEYSS PCDF-RS--S FRSVTPDSLGL HTTPAR--GE EELSNYICMG GKGASTLAP NGHYILSRGG NGHRYIPGAN LGTSPALFGD EAAGAADDN RFRKRTHSAG TS-PT---I  
Mic\_oc1 -----VSL SSSSTSGHGS TSDCLFP----- --RRS--SA SVSGSPSDGG FISSDEYSS PCDF-RS--S FRSVTPDSLGL HTTPAR--GE EELSNYICMG GKGASTLAP NGHYILSRGG NGHRYIPGAN LGTSPALFGD EAAGAADDN RFRKRTHSAG TS-PT---I  
Per\_ma1 -----VSL SSSSTSGHGS TSDCLFP----- --RRS--SA SVSGSPSDGG FISSDEYSS PCDF-RS--S FRSVTPDSLGL HTTPAR--GE EELSNYICMG GKGASTLAP NGHYILSRGG NGHRYIPGAN LGTSPALFGD EAAGAADDN RFRKRTHSAG TS-PT---I  
Pro\_co1 -----VSL SSSSTSGHGS TSDCLFP----- --RRS--SA SVSGSPSDGG FISSDEYSS PCDF-RS--S FRSVTPDSLGL HTTPAR--GE EELSNYICMG GKGASTLAP NGHYILSRGG NGHRYIPGAN LGTSPALFGD EAAGAADDN RFRKRTHSAG TS-PT---I  
Mic\_mu1 -----VSL SSSSTSGHGS TSDCLFP----- --RRS--SA SVSGSPSDGG FISSDEYSS PCDF-RS--S FRSVTPDSLGL HTTPAR--GE EELSNYICMG GKGASTLAP NGHYILSRGG NGHRYIPGAN LGTSPALFGD EAAGAADDN RFRKRTHSAG TS-PT---I  
Ovi\_arm1 -----VSL SSSSTSGHGS TSDCLFP----- --RRS--SA SVSGSPSDGG FISSDEYSS PCDF-RS--S FRSVTPDSLGL HTTPAR--GE EELSNYICMG GKGASTLAP NGHYILSRGG NGHRYIPGAN LGTSPALFGD EAAGAADDN RFRKRTHSAG TS-PT---I  
Orc\_or1 -----VSL SSSSTSGHGS TSDCLFP----- --RRS--SA SVSGSPSDGG FISSDEYSS PCDF-RS--S FRSVTPDSLGL HTTPAR--GE EELSNYICMG GKGASTLAP NGHYILSRGG NGHRYIPGAN LGTSPALFGD EAAGAADDN RFRKRTHSAG TS-PT---I  
Xen\_tr1 -----VSL SSSSTSGHGS TSDCMCP----- --RRS--SA SVSGSPSDGG FISSDEYSS PCDF-RS--S FRSVTPDSLGL HTTPAR--GE EELSNYICMG KPSHQLRSQ QRYQLRSR----- --EHPDFDK VFRKRTHSAG TSPT---V  
Mus\_mu2 -----GSL S--SSSGHGS GSYPPLPGSH PHLPHLPHHP QQRPSGSGA SASGSPSDPG FMSLDEYSS FGDL-RAFSS HRNTPESIA ETTPARDGG GELYGYMSMD RP---LSHC- GRPYRVS- --DGAQDLD RGLKRTYSLT TP-----  
Rat\_no2 -----GSL S--SSSGHGS GSYPPLPGSH PHLPHLPHHP QQRPSGSGA SASGSPSDPG FMSLDEYSS FGDL-RAFSS HRNTPESIA ETTPARDGG GELYGYMSMD RP---LSHC- GRPYRVS- --DGAQDLD RGLKRTYSLT TP-----  
Mes\_aul -----GSL S--SSSGHGS GSYPPLPGSH PHLPHLPHHP QQRPSGSGA SASGSPSDPG FMSLDEYSS FGDL-RAFSS HRNTPESIA ETTPARDGG GELYGYMSMD RP---LSHC- GRPYRVS- --DGAQDLD RGLKRTYSLT TP-----  
Mic\_oc2 -----GSL S--SSSGHGS GSYPPLPGSH PHLPHLPHHP QQRPSGSGA SASGSPSDPG FMSLDEYSS FGDL-RAFSS HRNTPESIA ETTPARDGG GELYGYMSMD RP---LSHC- GRPYRVS- --DGAQDLD RGLKRTYSLT TP-----  
Per\_ma2 -----GSL S--SSSGHGS GSYPPLPGSH PHLPHLPHHP QQRPSGSGA SASGSPSDPG FMSLDEYSS FGDL-RAFSS HRNTPESIA ETTPARDGG GELYGYMSMD RP---LSHC- GRPYRVS- --DGAQDLD RGLKRTYSLT TP-----  
Pro\_co2 -----GSL S--SSSGHGS GSYPPLPGSH PHLPHLPHHP QQRPSGSGA SASGSPSDPG FMSLDEYSS FGDL-RAFSS HRNTPESIA ETTPARDGG GELYGYMSMD RP---LSHC- GRPYRVS- --DGAQDLD RGLKRTYSLT TP-----  
Mic\_mu2 -----GSL S--SSSGHGS GSYPPLPGSH PHLPHLPHHP QQRPSGSGA SASGSPSDPG FMSLDEYSS FGDL-RAFSS HRNTPESIA ETTPARDGG GELYGYMSMD RP---LSHC- GRPYRVS- --DGAQDLD RGLKRTYSLT TP-----  
Ovi\_arm2 -----GSL S--SSSGHGS GSYPPLPGSH PHLPHLPHHP QQRPSGSGA SASGSPSDPG FMSLDEYSS FGDL-RVYCC HRNTPESIA ETTPARDGSA GELYGYMSMD RP---LSHC- GRPYRVS- --DGAQDLD RGLKRTYSLT TP-----  
Orc\_or2 -----GSL S--SSSGHGS GSYPPLPGSH PHLPHLPHHP QQRPSGSGA SASGSPSDPG FMSLDEYSS FGDL-RAFSS HRNTPESIA ETTPARDGSA GELYGYMSMD RP---LSHC- GRPYRVS- --DGAQDLD RGLKRTYSLT TP-----  
Xen\_tr2 -----ISL SSSSGHGS TSDPLIP----- --PMSGFCSA SASGSPSDTG FMSLDEYSS PGEIARVYLS CFSGTPDSAS ATPHH--- --GELNGYMSME RQFPGVCS- --RHLG- --SVA--EK CARKRTYSLT TP-----

Mus\_mu3 -----RSP -----SERA KQDYFKP----- --LERMGSTH SY-KGLDLGG----- --NYITMG-----  
Rat\_no3 -----RSP -----GERA KQDYVNP----- --LERMGSTH SY-RGDLGG----- --DYIIMG-----  
Mes\_aul -----RSP -----GERA KQDH-KT----- --LERMGSTH SY-KGLDLGG----- --DYIIMG-----  
Mic\_oc3 -----RSP -----GERA KQDYFKT----- --LERMGSTH SY-KELDLG----- --DYIIMG-----  
Per\_ma3 -----RSP -----GERA KQDYLKA----- --LERMGSTH SY-KGLDLGG----- --DYIIMG-----  
Pro\_co3 -----SSL SRRGCLGERI KQTLRT----- --PVRILGAA LYSKRLDPGG----- --GYINMR-----  
Mic\_mu3 -----SSL SRRGCLGERI KQATLGT----- --PARLGA A LHSKALDQGG----- --SYIIMG-----  
Ovi\_arm3 -----SEL ---NRNNGRS E-----T----- --LARLGA A SNTARLERGG----- --SYITMG-----  
Orc\_or3 -----SSL YRPGRLSERS EQATLKT----- --LARFGAA SPEGLELGG----- --VYITMG-----  
Xen\_tr3 -----EEE -----SRRGCLGERI KQATLGT----- --EERKGVAR ETNESAADYG SASSDEYSS FGVL-EA----- --PVFLP PFPGR----- --ETNYSMA LYG----- --RRSLVME-----PI---S

Mus\_mu4 --KDKGEEG NRGDCIPMNN WSGNGRGSS GGRGSSGQGS SS----- --QG-----SGRGQSGSSG Q-----GSG QGQ-AG---- --GNQCSGNGQ GTAGHGSGG-----G-----G GHGSGGQRP GDHGSGGG-----KN-----SGSG NSD-DGDRGK SVKRSYFGK FTQSK---Q  
Rat\_no4 --KDKGEEG NRGDCIPMNN WSGNGRGSS GGRGSSGQGS SS----- --QG-----SGRGQSGSSG Q-----GSG QGQ-AG---- --GNQCSGNGQ GTAGHGSGG-----G-----G GHGSGGQRP GDHGSGGG-----KNS GSKGSGSGK NSD-DGDRGK SVKRSYFGK FTQSKQOQQO  
Mes\_aul --KDKSEEA NEGDIYMPNN WSGNGRGSS GGRGSSGQGS SS----- --QSSGNQY SGRGQSGG--GQSGG-RGSG QGQ-AG---- --GNQCSGNGQ G-AGHGSGGQ QGRF-----G GHGSGGQRP GDHGSGGG-----KNS GSKGSGSGK NSD-DGDRGK SLKRSYFGK FTQSK---Q  
Mic\_oc4 --KDKDAEB NEGDIYMPNN WSGNGRGSS GGRGSSGQGS SS----- --QSSGNQY SGRGQSGG--GQSGG-RGSG QGQ-AG---- --GNQCSGNGQ GTAGHGSGG QGRF-----G GHGSGGQRP GDHGSGGG-----KNS GSKGSGSGK NSD-DGDRGK SLKRSYFGK FTQSK---Q  
Per\_ma4 --KDKSEEG NEGDIYMPNN WSGNGRGSS GGRGSSGQGS SS----- --QSSGNQY SGRGQSGG--GQSGG-QGSG QGQ-AG---- --GNQCSGNG-----GHGSG QGRF-----G GHGSGGQRP GDHGSGGG-----KNS GSKGSGSGK NSD-DGDRGK SLKRSYFGK FTQSK---Q  
Pro\_co4 NPOQKEDQEG NEGDIYMPNN WSGNGRGSS GGRGSSGQGS SS----- --QSSGNQY SGRGQSGG--GQSGG-QGSG QGQ-AG---- --GNQCSGNGQ GTAG--GSGG QGQAG---G GHGSGGQRP GDHGSGGG-----KNS GSKGSGSGK GABGDGERG SLKRSYFGK LQSK---Q  
Mic\_mu4 NPOQKEDQEG NEGDIYMPNN WSGNGRGSS GGRGSSGQGS SS----- --QSSGNQY SGRGQSGG--GQSGG-QGSG QGQ-AG---- --GNQCSGNGQ GTAG--GSGG QGQAG---G GHGSGGQRP GDHGSGGG-----KNS GSKGSGSGK GABGDGERG SLKRSYFGK LQSK---Q  
Ovi\_arm4 GPOQKEDQEG NEGDIYMPNN WSGNGRGSS GGRGSSGQGS SS----- --QSSGNQY SGRGQSGG--GQSGG-QGSG QGQ-AG---- --GNQCSGNGQ GTAG--GSGG QGQAG---G GHGSGGQRP GDHGSGGG-----KNS GSKGSGSGK GABGDGERG SLKRSYFGK LQSK---Q  
Orc\_or4 NPOQKEDQEG NEGDIYMPNN WSGNGRGSS GGRGSSGQGS SS----- --QSSGNQY SGRGQSGG--GQSGG-QGSG QGQ-AG---- --GNQCSGNGQ GTAG--GSGG QGQAG---G GHGSGGQRP GDHGSGGG-----RNS GSKGSGSGK GSEGNDRGK SLKRSYFGK LQSK---Q  
Xen\_tr4 -----RSP----- --SSSGHGS ASETL----- --TRPS--SS SVRGSFGSG FISSDEYSS FGDL-RYF-R VRSNTPDSLGT NPTPIQ--EE NTLSDMSMS THSHFDK----- --DDYMEADK CFRKRTYSLT KPTKS---A
