# Supplementary material for: Evolution of the vertebrate insulin receptor substrate (Irs) gene family
Source: PubMed Central journal article supplement (PMC5482937; doi:10.1186/s12862-017-0994-z), 2017-06-23
Supplement: 12862_2017_994_MOESM13_ESM.pdf [file 12862_2017_994_MOESM13_ESM.pdf]

## A Irs1

Best-fit model according to BIC: K3Pu+I+G4

List of models sorted by BIC scores:

| Model      | LogL        | AIC        | w-AIC    | AICc       | w-AICc   | BIC        | w-BIC    |
|------------|-------------|------------|----------|------------|----------|------------|----------|
| K3Pu+I+G4  | -37061.1078 | 74486.2156 | + 0.0944 | 74520.1148 | + 0.1316 | 75518.5728 | + 0.7881 |
| TIM+I+G4   | -37058.6823 | 74483.3646 | + 0.3927 | 74517.6538 | + 0.4505 | 75521.3941 | + 0.1923 |
| HKY+I+G4   | -37069.2419 | 74500.4839 | - 0.0001 | 74533.9956 | - 0.0001 | 75527.1688 | - 0.0107 |
| TVM+I+G4   | -37058.8578 | 74485.7156 | + 0.1212 | 74520.3972 | + 0.1143 | 75529.4174 | - 0.0035 |
| TN+I+G4    | -37066.9425 | 74497.8850 | - 0.0003 | 74531.7843 | - 0.0004 | 75530.2423 | - 0.0023 |
| TPM3u+I+G4 | -37068.1624 | 74500.3247 | - 0.0001 | 74534.2240 | - 0.0001 | 75532.6820 | - 0.0007 |
| TPM3+I+G4  | -37068.1731 | 74500.3463 | - 0.0001 | 74534.2455 | - 0.0001 | 75532.7035 | - 0.0007 |
| GTR+I+G4   | -37056.6877 | 74483.3753 | + 0.3907 | 74518.4518 | + 0.3023 | 75532.7494 | - 0.0007 |
| TPM2u+I+G4 | -37068.5323 | 74501.0646 | - 0.0001 | 74534.9638 | - 0.0001 | 75533.4218 | - 0.0005 |
| TPM2+I+G4  | -37068.5328 | 74501.0656 | - 0.0001 | 74534.9648 | - 0.0001 | 75533.4228 | - 0.0005 |
| TIM3+I+G4  | -37066.0278 | 74498.0555 | - 0.0003 | 74532.3447 | - 0.0003 | 75536.0850 | - 0.0001 |
| TIM2+I+G4  | -37067.2053 | 74500.4107 | - 0.0001 | 74534.6999 | - 0.0001 | 75538.4402 | - 0.0000 |
| SYM+I+G4   | -37126.2243 | 74616.4487 | - 0.0000 | 74650.3479 | - 0.0000 | 75648.8059 | - 0.0000 |
| TIM3e+I+G4 | -37133.9153 | 74627.8305 | - 0.0000 | 74660.9571 | - 0.0000 | 75648.8432 | - 0.0000 |
| TNe+I+G4   | -37155.7739 | 74669.5478 | - 0.0000 | 74702.2917 | - 0.0000 | 75684.8881 | - 0.0000 |
| TIMe+I+G4  | -37152.2099 | 74664.4198 | - 0.0000 | 74697.5464 | - 0.0000 | 75685.4325 | - 0.0000 |
| TVMe+I+G4  | -37150.8461 | 74663.6923 | - 0.0000 | 74697.2040 | - 0.0000 | 75690.3772 | - 0.0000 |
| TIM2e+I+G4 | -37155.6599 | 74671.3197 | - 0.0000 | 74704.4463 | - 0.0000 | 75692.3324 | - 0.0000 |
| K2P+I+G4   | -37176.5262 | 74709.0524 | - 0.0000 | 74741.4160 | - 0.0000 | 75718.7204 | - 0.0000 |
| K3P+I+G4   | -37173.1008 | 74704.2016 | - 0.0000 | 74736.9455 | - 0.0000 | 75719.5420 | - 0.0000 |
| K3Pu+G4    | -37284.3723 | 74930.7446 | - 0.0000 | 74964.2563 | - 0.0000 | 75957.4296 | - 0.0000 |
| TVM+G4     | -37277.9702 | 74921.9403 | - 0.0000 | 74956.2295 | - 0.0000 | 75959.9699 | - 0.0000 |
| TPM3+G4    | -37285.7080 | 74933.4159 | - 0.0000 | 74966.9276 | - 0.0000 | 75960.1009 | - 0.0000 |
| TPM3u+G4   | -37285.7081 | 74933.4162 | - 0.0000 | 74966.9279 | - 0.0000 | 75960.1011 | - 0.0000 |
| HKY+G4     | -37290.7158 | 74941.4317 | - 0.0000 | 74974.5583 | - 0.0000 | 75962.4443 | - 0.0000 |
| GTR+G4     | -37277.1066 | 74922.2132 | - 0.0000 | 74956.8949 | - 0.0000 | 75965.9151 | - 0.0000 |
| TIM+G4     | -37285.9029 | 74935.8059 | - 0.0000 | 74969.7051 | - 0.0000 | 75968.1631 | - 0.0000 |
| TIM3+G4    | -37285.9369 | 74935.8737 | - 0.0000 | 74969.7729 | - 0.0000 | 75968.2309 | - 0.0000 |
| TPM2u+G4   | -37290.5128 | 74943.0255 | - 0.0000 | 74976.5372 | - 0.0000 | 75969.7105 | - 0.0000 |
| TPM2+G4    | -37290.5128 | 74943.0257 | - 0.0000 | 74976.5374 | - 0.0000 | 75969.7106 | - 0.0000 |
| TN+G4      | -37290.6346 | 74943.2692 | - 0.0000 | 74976.7809 | - 0.0000 | 75969.9542 | - 0.0000 |
| TIM2+G4    | -37290.6645 | 74945.3290 | - 0.0000 | 74979.2282 | - 0.0000 | 75977.6862 | - 0.0000 |
| SYM+G4     | -37335.4868 | 75032.9736 | - 0.0000 | 75066.4853 | - 0.0000 | 76059.6585 | - 0.0000 |
| TIM3e+G4   | -37344.1919 | 75046.3837 | - 0.0000 | 75079.1276 | - 0.0000 | 76061.7241 | - 0.0000 |
| TVMe+G4    | -37354.6588 | 75069.3177 | - 0.0000 | 75102.4443 | - 0.0000 | 76090.3303 | - 0.0000 |
| TNe+G4     | -37371.3725 | 75098.7450 | - 0.0000 | 75131.1087 | - 0.0000 | 76108.4131 | - 0.0000 |
| TIMe+G4    | -37367.9417 | 75093.8834 | - 0.0000 | 75126.6273 | - 0.0000 | 76109.2237 | - 0.0000 |
| TIM2e+G4   | -37371.3713 | 75100.7426 | - 0.0000 | 75133.4865 | - 0.0000 | 76116.0830 | - 0.0000 |
| K2P+G4     | -37387.6280 | 75129.2560 | - 0.0000 | 75161.2418 | - 0.0000 | 76133.2517 | - 0.0000 |
| K3P+G4     | -37384.0399 | 75124.0798 | - 0.0000 | 75156.4435 | - 0.0000 | 76133.7479 | - 0.0000 |
| F81+I+G4   | -38679.7916 | 77719.5832 | - 0.0000 | 77752.7098 | - 0.0000 | 78740.5958 | - 0.0000 |
| TIM3+I     | -38828.6167 | 78021.2333 | - 0.0000 | 78055.1326 | - 0.0000 | 79053.5906 | - 0.0000 |
| TN+I       | -38835.0529 | 78032.1058 | - 0.0000 | 78065.6175 | - 0.0000 | 79058.7907 | - 0.0000 |
| TIM+I      | -38832.2237 | 78028.4474 | - 0.0000 | 78062.3466 | - 0.0000 | 79060.8046 | - 0.0000 |
| GTR+I      | -38825.7646 | 78019.5293 | - 0.0000 | 78054.2109 | - 0.0000 | 79063.2311 | - 0.0000 |
| TIM2+I     | -38834.8893 | 78033.7787 | - 0.0000 | 78067.6779 | - 0.0000 | 79066.1359 | - 0.0000 |
| JC+I+G4    | -38884.6959 | 78123.3917 | - 0.0000 | 78155.3775 | - 0.0000 | 79127.3875 | - 0.0000 |
| HKY+I      | -38885.6008 | 78131.2017 | - 0.0000 | 78164.3283 | - 0.0000 | 79152.2143 | - 0.0000 |
| K3Pu+I     | -38882.1184 | 78126.2367 | - 0.0000 | 78159.7484 | - 0.0000 | 79152.9217 | - 0.0000 |
| TPM3u+I    | -38882.9664 | 78127.9329 | - 0.0000 | 78161.4446 | - 0.0000 | 79154.6178 | - 0.0000 |
| TPM3+I     | -38882.9715 | 78127.9429 | - 0.0000 | 78161.4546 | - 0.0000 | 79154.6278 | - 0.0000 |
| F81+G4     | -38891.8452 | 78141.6904 | - 0.0000 | 78174.4343 | - 0.0000 | 79157.0307 | - 0.0000 |
| TPM2u+I    | -38885.3706 | 78132.7413 | - 0.0000 | 78166.2530 | - 0.0000 | 79159.4262 | - 0.0000 |
| TPM2+I     | -38885.3714 | 78132.7428 | - 0.0000 | 78166.2545 | - 0.0000 | 79159.4277 | - 0.0000 |
| TVM+I      | -38880.0721 | 78126.1441 | - 0.0000 | 78160.4333 | - 0.0000 | 79164.1737 | - 0.0000 |
| TNe+I      | -38949.2109 | 78254.4217 | - 0.0000 | 78286.7854 | - 0.0000 | 79264.0898 | - 0.0000 |
| TIM3e+I    | -38947.7245 | 78253.4490 | - 0.0000 | 78286.1929 | - 0.0000 | 79268.7894 | - 0.0000 |
| TIMe+I     | -38948.1376 | 78254.2753 | - 0.0000 | 78287.0192 | - 0.0000 | 79269.6156 | - 0.0000 |
| TIM2e+I    | -38949.2392 | 78256.4785 | - 0.0000 | 78289.2224 | - 0.0000 | 79271.8188 | - 0.0000 |
| SYM+I      | -38946.1234 | 78254.2468 | - 0.0000 | 78287.7585 | - 0.0000 | 79280.9318 | - 0.0000 |
| K2P+I      | -39015.4993 | 78384.9986 | - 0.0000 | 78416.9844 | - 0.0000 | 79388.9944 | - 0.0000 |
| K3P+I      | -39014.4135 | 78384.8270 | - 0.0000 | 78417.1907 | - 0.0000 | 79394.4951 | - 0.0000 |
| TVMe+I     | -39012.0125 | 78384.0251 | - 0.0000 | 78417.1517 | - 0.0000 | 79405.0377 | - 0.0000 |

|       |             |            |          |            |          |            |          |
|-------|-------------|------------|----------|------------|----------|------------|----------|
| JC+G4 | -39097.8152 | 78547.6304 | - 0.0000 | 78579.2408 | - 0.0000 | 79545.9539 | - 0.0000 |
| F81+I | -40408.5758 | 81175.1515 | - 0.0000 | 81207.8954 | - 0.0000 | 82190.4919 | - 0.0000 |
| JC+I  | -40535.4801 | 81422.9601 | - 0.0000 | 81454.5705 | - 0.0000 | 82421.2836 | - 0.0000 |
| GTR   | -42668.0602 | 85702.1205 | - 0.0000 | 85736.4097 | - 0.0000 | 86740.1500 | - 0.0000 |
| TIM3  | -42695.1474 | 85752.2948 | - 0.0000 | 85785.8065 | - 0.0000 | 86778.9797 | - 0.0000 |
| SYM   | -42713.0640 | 85786.1280 | - 0.0000 | 85819.2546 | - 0.0000 | 86807.1407 | - 0.0000 |
| TIM2  | -42709.2339 | 85780.4679 | - 0.0000 | 85813.9796 | - 0.0000 | 86807.1528 | - 0.0000 |
| TIM3e | -42721.1774 | 85798.3549 | - 0.0000 | 85830.7185 | - 0.0000 | 86808.0229 | - 0.0000 |
| TN    | -42730.9523 | 85821.9045 | - 0.0000 | 85855.0311 | - 0.0000 | 86842.9172 | - 0.0000 |
| TIM   | -42730.3111 | 85822.6222 | - 0.0000 | 85856.1339 | - 0.0000 | 86849.3071 | - 0.0000 |
| TNe   | -42766.3174 | 85886.6347 | - 0.0000 | 85918.6205 | - 0.0000 | 86890.6305 | - 0.0000 |
| TIM2e | -42763.5235 | 85883.0469 | - 0.0000 | 85915.4105 | - 0.0000 | 86892.7150 | - 0.0000 |
| TIMe  | -42764.8343 | 85885.6685 | - 0.0000 | 85918.0322 | - 0.0000 | 86895.3366 | - 0.0000 |
| TVM   | -42796.9935 | 85957.9871 | - 0.0000 | 85991.8863 | - 0.0000 | 86990.3443 | - 0.0000 |
| TPM3u | -42816.3968 | 85992.7935 | - 0.0000 | 86025.9201 | - 0.0000 | 87013.8062 | - 0.0000 |
| TPM3  | -42816.6065 | 85993.2131 | - 0.0000 | 86026.3397 | - 0.0000 | 87014.2257 | - 0.0000 |
| TPM2  | -42858.3573 | 86076.7145 | - 0.0000 | 86109.8411 | - 0.0000 | 87097.7272 | - 0.0000 |
| TPM2u | -42858.3991 | 86076.7982 | - 0.0000 | 86109.9248 | - 0.0000 | 87097.8108 | - 0.0000 |
| HKY   | -42871.4414 | 86100.8827 | - 0.0000 | 86133.6266 | - 0.0000 | 87116.2231 | - 0.0000 |
| K3Pu  | -42870.6205 | 86101.2410 | - 0.0000 | 86134.3676 | - 0.0000 | 87122.2537 | - 0.0000 |
| TVMe  | -42896.1006 | 86150.2013 | - 0.0000 | 86182.9452 | - 0.0000 | 87165.5416 | - 0.0000 |
| K2P   | -42948.3723 | 86248.7445 | - 0.0000 | 86280.3549 | - 0.0000 | 87247.0680 | - 0.0000 |
| K3P   | -42946.8573 | 86247.7146 | - 0.0000 | 86279.7004 | - 0.0000 | 87251.7104 | - 0.0000 |
| F81   | -44289.3810 | 88934.7621 | - 0.0000 | 88967.1257 | - 0.0000 | 89944.4302 | - 0.0000 |
| JC    | -44381.6115 | 89113.2230 | - 0.0000 | 89144.4604 | - 0.0000 | 90105.8742 | - 0.0000 |

SUBSTITUTION PROCESS

Model of substitution: K3Pu+F+I+G4

Rate parameter R:

A-C: 1.0000  
A-G: 4.5418  
A-T: 0.6837  
C-G: 0.6837  
C-T: 4.5418  
G-T: 1.0000

State frequencies: (empirical counts from alignment)

pi(A) = 0.221  
pi(C) = 0.3233  
pi(G) = 0.264  
pi(T) = 0.1917

Rate matrix Q:

|   |         |         |        |         |
|---|---------|---------|--------|---------|
| A | -1.094  | 0.2139  | 0.7933 | 0.08669 |
| C | 0.1462  | -0.8415 | 0.1194 | 0.5759  |
| G | 0.664   | 0.1462  | -0.937 | 0.1268  |
| T | 0.09996 | 0.9713  | 0.1747 | -1.246  |

Model of rate heterogeneity: Invar+Gamma with 4 categories

Proportion of invariable sites: 0.4083

Gamma shape alpha: 0.7233

| Category | Relative_rate | Proportion |
|----------|---------------|------------|
| 0        | 0             | 0.4083     |
| 1        | 0.1338        | 0.1479     |
| 2        | 0.6326        | 0.1479     |
| 3        | 1.577         | 0.1479     |
| 4        | 4.416         | 0.1479     |

Relative rates are computed as MEAN of the portion of the Gamma distribution falling in the category.

## B Irs2

Best-fit model according to BIC: TPM2u+I+G4

List of models sorted by BIC scores:

| Model      | LogL        | AIC        | w-AIC    | AICc       | w-AICc   | BIC        | w-BIC    |
|------------|-------------|------------|----------|------------|----------|------------|----------|
| TPM2u+I+G4 | -37565.4173 | 75458.8346 | + 0.0927 | 75493.7282 | + 0.1272 | 76352.2658 | + 0.4371 |
| TPM2+I+G4  | -37565.4221 | 75458.8442 | + 0.0923 | 75493.7378 | + 0.1266 | 76352.2754 | + 0.4350 |
| TIM2+I+G4  | -37562.9478 | 75455.8956 | + 0.4031 | 75491.2376 | + 0.4420 | 76354.7746 | + 0.1247 |
| TVM+I+G4   | -37563.4013 | 75458.8027 | + 0.0942 | 75494.5961 | + 0.0824 | 76363.1294 | - 0.0019 |
| GTR+I+G4   | -37561.1871 | 75456.3742 | + 0.3173 | 75492.6222 | + 0.2212 | 76366.1486 | - 0.0004 |
| HKY+I+G4   | -37576.6532 | 75479.3063 | - 0.0000 | 75513.7548 | - 0.0000 | 76367.2898 | - 0.0002 |
| TN+I+G4    | -37572.9708 | 75473.9415 | - 0.0000 | 75508.8352 | - 0.0001 | 76367.3727 | - 0.0002 |
| K3Pu+I+G4  | -37573.2368 | 75474.4736 | - 0.0000 | 75509.3672 | - 0.0001 | 76367.9048 | - 0.0002 |
| TIM+I+G4   | -37570.1249 | 75470.2498 | - 0.0003 | 75505.5917 | - 0.0003 | 76369.1287 | - 0.0001 |
| TPM3u+I+G4 | -37575.1797 | 75478.3595 | - 0.0000 | 75513.2531 | - 0.0000 | 76371.7907 | - 0.0000 |
| TPM3+I+G4  | -37575.1845 | 75478.3691 | - 0.0000 | 75513.2627 | - 0.0000 | 76371.8003 | - 0.0000 |
| TIM3+I+G4  | -37572.1629 | 75474.3258 | - 0.0000 | 75509.6677 | - 0.0000 | 76373.2047 | - 0.0000 |
| TIM3e+I+G4 | -37638.5682 | 75601.1364 | - 0.0000 | 75635.1429 | - 0.0000 | 76483.6721 | - 0.0000 |
| SYM+I+G4   | -37637.3234 | 75602.6467 | - 0.0000 | 75637.5403 | - 0.0000 | 76496.0779 | - 0.0000 |
| TVMe+I+G4  | -37652.4550 | 75630.9099 | - 0.0000 | 75665.3584 | - 0.0000 | 76518.8934 | - 0.0000 |
| TPM2u+G4   | -37662.2263 | 75650.4526 | - 0.0000 | 75684.9011 | - 0.0000 | 76538.4361 | - 0.0000 |
| TPM2+G4    | -37662.3571 | 75650.7141 | - 0.0000 | 75685.1626 | - 0.0000 | 76538.6976 | - 0.0000 |
| TNe+I+G4   | -37672.7641 | 75667.5282 | - 0.0000 | 75701.0957 | - 0.0000 | 76544.6161 | - 0.0000 |
| TIM2+G4    | -37662.2305 | 75652.4610 | - 0.0000 | 75687.3546 | - 0.0000 | 76545.8922 | - 0.0000 |
| TVM+G4     | -37658.8967 | 75647.7935 | - 0.0000 | 75683.1354 | - 0.0000 | 76546.6724 | - 0.0000 |
| TIM2e+I+G4 | -37671.1428 | 75666.2856 | - 0.0000 | 75700.2921 | - 0.0000 | 76548.8213 | - 0.0000 |
| TIMe+I+G4  | -37672.7707 | 75669.5413 | - 0.0000 | 75703.5478 | - 0.0000 | 76552.0770 | - 0.0000 |
| GTR+G4     | -37659.0645 | 75650.1290 | - 0.0000 | 75685.9224 | - 0.0000 | 76554.4557 | - 0.0000 |
| HKY+G4     | -37674.2248 | 75672.4496 | - 0.0000 | 75706.4560 | - 0.0000 | 76554.9853 | - 0.0000 |
| K3Pu+G4    | -37670.9718 | 75667.9436 | - 0.0000 | 75702.3920 | - 0.0000 | 76555.9270 | - 0.0000 |
| TPM3u+G4   | -37671.7805 | 75669.5611 | - 0.0000 | 75704.0095 | - 0.0000 | 76557.5445 | - 0.0000 |
| TPM3+G4    | -37671.7903 | 75669.5806 | - 0.0000 | 75704.0290 | - 0.0000 | 76557.5640 | - 0.0000 |
| TN+G4      | -37672.2657 | 75670.5315 | - 0.0000 | 75704.9799 | - 0.0000 | 76558.5149 | - 0.0000 |
| TIM+G4     | -37668.8899 | 75665.7799 | - 0.0000 | 75700.6735 | - 0.0000 | 76559.2111 | - 0.0000 |
| TIM3+G4    | -37669.6211 | 75667.2422 | - 0.0000 | 75702.1358 | - 0.0000 | 76560.6734 | - 0.0000 |
| K2P+I+G4   | -37684.6949 | 75689.3898 | - 0.0000 | 75722.5216 | - 0.0000 | 76561.0300 | - 0.0000 |
| K3P+I+G4   | -37684.6953 | 75691.3906 | - 0.0000 | 75724.9581 | - 0.0000 | 76568.4785 | - 0.0000 |
| TIM3e+G4   | -37733.1795 | 75788.3589 | - 0.0000 | 75821.9265 | - 0.0000 | 76665.4469 | - 0.0000 |
| SYM+G4     | -37731.9635 | 75789.9269 | - 0.0000 | 75824.3754 | - 0.0000 | 76677.9104 | - 0.0000 |
| TVMe+G4    | -37747.1759 | 75818.3518 | - 0.0000 | 75852.3583 | - 0.0000 | 76700.8876 | - 0.0000 |
| TNe+G4     | -37768.0604 | 75856.1208 | - 0.0000 | 75889.2526 | - 0.0000 | 76727.7610 | - 0.0000 |
| TIM2e+G4   | -37766.4461 | 75854.8922 | - 0.0000 | 75888.4597 | - 0.0000 | 76731.9801 | - 0.0000 |
| TIMe+G4    | -37768.1004 | 75858.2007 | - 0.0000 | 75891.7683 | - 0.0000 | 76735.2887 | - 0.0000 |
| K2P+G4     | -37780.3495 | 75878.6989 | - 0.0000 | 75911.3982 | - 0.0000 | 76744.8914 | - 0.0000 |
| K3P+G4     | -37780.3504 | 75880.7008 | - 0.0000 | 75913.8327 | - 0.0000 | 76752.3411 | - 0.0000 |
| F81+I+G4   | -38774.4174 | 77872.8349 | - 0.0000 | 77906.8413 | - 0.0000 | 78755.3706 | - 0.0000 |
| JC+I+G4    | -38847.8292 | 78013.6585 | - 0.0000 | 78046.3577 | - 0.0000 | 78879.8509 | - 0.0000 |
| F81+G4     | -38866.8691 | 78055.7382 | - 0.0000 | 78089.3058 | - 0.0000 | 78932.8262 | - 0.0000 |
| JC+G4      | -38940.5969 | 78197.1937 | - 0.0000 | 78229.4635 | - 0.0000 | 79057.9384 | - 0.0000 |
| GTR+I      | -39395.2398 | 79122.4797 | - 0.0000 | 79158.2731 | - 0.0000 | 80026.8064 | - 0.0000 |
| TIM2+I     | -39407.0384 | 79142.0768 | - 0.0000 | 79176.9704 | - 0.0000 | 80035.5080 | - 0.0000 |
| TIM3+I     | -39415.7389 | 79159.4778 | - 0.0000 | 79194.3714 | - 0.0000 | 80052.9090 | - 0.0000 |
| TN+I       | -39425.7449 | 79177.4897 | - 0.0000 | 79211.9382 | - 0.0000 | 80065.4732 | - 0.0000 |
| TIM+I      | -39424.8360 | 79177.6721 | - 0.0000 | 79212.5657 | - 0.0000 | 80071.1033 | - 0.0000 |
| TVM+I      | -39432.3314 | 79194.6629 | - 0.0000 | 79230.0048 | - 0.0000 | 80093.5418 | - 0.0000 |
| TPM3+I     | -39447.6397 | 79221.2793 | - 0.0000 | 79255.7278 | - 0.0000 | 80109.2628 | - 0.0000 |
| TPM3u+I    | -39447.6470 | 79221.2940 | - 0.0000 | 79255.7424 | - 0.0000 | 80109.2775 | - 0.0000 |
| TIM3e+I    | -39455.3703 | 79232.7405 | - 0.0000 | 79266.3081 | - 0.0000 | 80109.8285 | - 0.0000 |
| SYM+I      | -39450.0157 | 79226.0314 | - 0.0000 | 79260.4798 | - 0.0000 | 80114.0149 | - 0.0000 |
| TPM2u+I    | -39454.2048 | 79234.4095 | - 0.0000 | 79268.8580 | - 0.0000 | 80122.3930 | - 0.0000 |
| TPM2+I     | -39454.2609 | 79234.5217 | - 0.0000 | 79268.9702 | - 0.0000 | 80122.5052 | - 0.0000 |
| HKY+I      | -39466.8369 | 79257.6739 | - 0.0000 | 79291.6803 | - 0.0000 | 80140.2096 | - 0.0000 |
| K3Pu+I     | -39466.1520 | 79258.3040 | - 0.0000 | 79292.7525 | - 0.0000 | 80146.2875 | - 0.0000 |
| TIM2e+I    | -39491.1413 | 79304.2826 | - 0.0000 | 79337.8501 | - 0.0000 | 80181.3705 | - 0.0000 |
| TNe+I      | -39495.0965 | 79310.1930 | - 0.0000 | 79343.3248 | - 0.0000 | 80181.8332 | - 0.0000 |
| TIMe+I     | -39494.7584 | 79311.5168 | - 0.0000 | 79345.0844 | - 0.0000 | 80188.6048 | - 0.0000 |
| TVMe+I     | -39497.6315 | 79319.2629 | - 0.0000 | 79353.2694 | - 0.0000 | 80201.7986 | - 0.0000 |
| K2P+I      | -39542.7638 | 79403.5276 | - 0.0000 | 79436.2268 | - 0.0000 | 80269.7200 | - 0.0000 |

|       |             |            |          |            |          |            |          |
|-------|-------------|------------|----------|------------|----------|------------|----------|
| K3P+I | -39542.4090 | 79404.8180 | - 0.0000 | 79437.9498 | - 0.0000 | 80276.4582 | - 0.0000 |
| F81+I | -40544.1500 | 81410.2999 | - 0.0000 | 81443.8675 | - 0.0000 | 82287.3879 | - 0.0000 |
| JC+I  | -40598.4200 | 81512.8401 | - 0.0000 | 81545.1098 | - 0.0000 | 82373.5848 | - 0.0000 |
| GTR   | -42027.0906 | 84384.1813 | - 0.0000 | 84419.5232 | - 0.0000 | 85283.0603 | - 0.0000 |
| TVM   | -42068.3007 | 84464.6014 | - 0.0000 | 84499.4950 | - 0.0000 | 85358.0326 | - 0.0000 |
| TIM3  | -42075.2664 | 84476.5328 | - 0.0000 | 84510.9812 | - 0.0000 | 85364.5162 | - 0.0000 |
| TPM3u | -42109.0436 | 84542.0872 | - 0.0000 | 84576.0936 | - 0.0000 | 85424.6229 | - 0.0000 |
| TPM3  | -42109.0803 | 84542.1607 | - 0.0000 | 84576.1671 | - 0.0000 | 85424.6964 | - 0.0000 |
| SYM   | -42112.3351 | 84548.6703 | - 0.0000 | 84582.6767 | - 0.0000 | 85431.2060 | - 0.0000 |
| TIM3e | -42122.6247 | 84565.2493 | - 0.0000 | 84598.3812 | - 0.0000 | 85436.8895 | - 0.0000 |
| TIM2  | -42163.2091 | 84652.4181 | - 0.0000 | 84686.8666 | - 0.0000 | 85540.4016 | - 0.0000 |
| TVMe  | -42192.3188 | 84706.6375 | - 0.0000 | 84740.2051 | - 0.0000 | 85583.7255 | - 0.0000 |
| TN    | -42204.6044 | 84733.2088 | - 0.0000 | 84767.2153 | - 0.0000 | 85615.7446 | - 0.0000 |
| TIM   | -42203.2961 | 84732.5923 | - 0.0000 | 84767.0407 | - 0.0000 | 85620.5757 | - 0.0000 |
| TIM2e | -42227.6273 | 84775.2545 | - 0.0000 | 84808.3863 | - 0.0000 | 85646.8947 | - 0.0000 |
| TNe   | -42235.5146 | 84789.0292 | - 0.0000 | 84821.7285 | - 0.0000 | 85655.2217 | - 0.0000 |
| TIMe  | -42235.2675 | 84790.5351 | - 0.0000 | 84823.6669 | - 0.0000 | 85662.1753 | - 0.0000 |
| TPM2u | -42232.4589 | 84788.9179 | - 0.0000 | 84822.9243 | - 0.0000 | 85671.4536 | - 0.0000 |
| TPM2  | -42232.6638 | 84789.3276 | - 0.0000 | 84823.3340 | - 0.0000 | 85671.8633 | - 0.0000 |
| HKY   | -42264.1695 | 84850.3390 | - 0.0000 | 84883.9066 | - 0.0000 | 85727.4270 | - 0.0000 |
| K3Pu  | -42263.0426 | 84850.0852 | - 0.0000 | 84884.0917 | - 0.0000 | 85732.6210 | - 0.0000 |
| K2P   | -42312.7499 | 84941.4997 | - 0.0000 | 84973.7695 | - 0.0000 | 85802.2444 | - 0.0000 |
| K3P   | -42312.4719 | 84942.9437 | - 0.0000 | 84975.6430 | - 0.0000 | 85809.1362 | - 0.0000 |
| F81   | -43270.2443 | 86860.4887 | - 0.0000 | 86893.6205 | - 0.0000 | 87732.1289 | - 0.0000 |
| JC    | -43326.6720 | 86967.3441 | - 0.0000 | 86999.1874 | - 0.0000 | 87822.6410 | - 0.0000 |

## SUBSTITUTION PROCESS

Model of substitution: TPM2u+F+I+G4

Rate parameter R:

A-C: 1.2830  
 A-G: 4.5975  
 A-T: 1.2830  
 C-G: 1.0000  
 C-T: 4.5975  
 G-T: 1.0000

State frequencies: (empirical counts from alignment)

pi(A) = 0.2328  
 pi(C) = 0.3089  
 pi(G) = 0.2664  
 pi(T) = 0.1919

Rate matrix Q:

|   |        |         |         |        |
|---|--------|---------|---------|--------|
| A | -1.111 | 0.2357  | 0.7284  | 0.1464 |
| C | 0.1777 | -0.8609 | 0.1584  | 0.5248 |
| G | 0.6367 | 0.1837  | -0.9345 | 0.1141 |
| T | 0.1777 | 0.8446  | 0.1584  | -1.181 |

Model of rate heterogeneity: Invar+Gamma with 4 categories

Proportion of invariable sites: 0.2775

Gamma shape alpha: 0.7751

| Category | Relative_rate | Proportion |
|----------|---------------|------------|
| 0        | 0             | 0.2775     |
| 1        | 0.1249        | 0.1806     |
| 2        | 0.5494        | 0.1806     |
| 3        | 1.315         | 0.1806     |
| 4        | 3.547         | 0.1806     |

Relative rates are computed as MEAN of the portion of the Gamma distribution falling in the category.

## C Irs3

Best-fit model according to BIC: TPM2u+I+G4

List of models sorted by BIC scores:

| Model      | LogL        | AIC        | w-AIC    | AICc       | w-AICc   | BIC        | w-BIC    |
|------------|-------------|------------|----------|------------|----------|------------|----------|
| TPM2u+I+G4 | -11704.5770 | 23745.1540 | - 0.0199 | 23885.3614 | + 0.1379 | 24476.3957 | + 0.2849 |
| TPM2+I+G4  | -11704.5959 | 23745.1918 | - 0.0195 | 23885.3992 | + 0.1353 | 24476.4335 | + 0.2796 |
| TIM2+I+G4  | -11701.6144 | 23741.2288 | + 0.1417 | 23883.4565 | + 0.3575 | 24476.8232 | + 0.2301 |
| TPM2u+G4   | -11709.3772 | 23752.7544 | - 0.0004 | 23890.9613 | - 0.0084 | 24479.6435 | + 0.0562 |
| TPM2+G4    | -11709.3878 | 23752.7757 | - 0.0004 | 23890.9826 | - 0.0083 | 24479.6648 | + 0.0556 |
| TIM+I+G4   | -11703.4953 | 23744.9905 | + 0.0216 | 23887.2182 | + 0.0545 | 24480.5849 | + 0.0351 |
| TIM2+G4    | -11706.9558 | 23749.9116 | - 0.0018 | 23890.1190 | - 0.0128 | 24481.1533 | + 0.0264 |
| GTR+I+G4   | -11697.9391 | 23737.8781 | + 0.7569 | 23884.2065 | + 0.2457 | 24482.1778 | - 0.0158 |
| TN+I+G4    | -11708.3463 | 23752.6925 | - 0.0005 | 23892.9000 | - 0.0032 | 24483.9343 | - 0.0066 |
| TVM+I+G4   | -11702.1434 | 23744.2868 | + 0.0307 | 23888.5547 | + 0.0279 | 24484.2338 | - 0.0057 |
| TIM3+I+G4  | -11706.6846 | 23751.3693 | - 0.0009 | 23893.5970 | - 0.0022 | 24486.9637 | - 0.0014 |
| GTR+G4     | -11703.9772 | 23747.9545 | - 0.0049 | 23892.2225 | - 0.0045 | 24487.9015 | - 0.0009 |
| TVM+G4     | -11707.2788 | 23752.5576 | - 0.0005 | 23894.7853 | - 0.0012 | 24488.1520 | - 0.0008 |
| K3Pu+I+G4  | -11710.8652 | 23757.7304 | - 0.0000 | 23897.9378 | - 0.0003 | 24488.9721 | - 0.0005 |
| TIM+G4     | -11711.3943 | 23758.7887 | - 0.0000 | 23898.9961 | - 0.0002 | 24490.0304 | - 0.0003 |
| HKY+I+G4   | -11716.5259 | 23767.0519 | - 0.0000 | 23905.2588 | - 0.0000 | 24493.9410 | - 0.0000 |
| TN+G4      | -11716.5838 | 23767.1676 | - 0.0000 | 23905.3745 | - 0.0000 | 24494.0567 | - 0.0000 |
| K3Pu+G4    | -11717.6138 | 23769.2277 | - 0.0000 | 23907.4346 | - 0.0000 | 24496.1168 | - 0.0000 |
| TIM3+G4    | -11715.4619 | 23766.9238 | - 0.0000 | 23907.1312 | - 0.0000 | 24498.1655 | - 0.0000 |
| TPM3u+I+G4 | -11715.9328 | 23767.8656 | - 0.0000 | 23908.0730 | - 0.0000 | 24499.1073 | - 0.0000 |
| TPM3+I+G4  | -11716.0413 | 23768.0827 | - 0.0000 | 23908.2901 | - 0.0000 | 24499.3244 | - 0.0000 |
| HKY+G4     | -11723.4627 | 23778.9253 | - 0.0000 | 23915.1514 | - 0.0000 | 24501.4618 | - 0.0000 |
| TPM3+G4    | -11723.0818 | 23780.1636 | - 0.0000 | 23918.3705 | - 0.0000 | 24507.0527 | - 0.0000 |
| TPM3u+G4   | -11723.0824 | 23780.1648 | - 0.0000 | 23918.3717 | - 0.0000 | 24507.0539 | - 0.0000 |
| SYM+I+G4   | -11793.8587 | 23923.7174 | - 0.0000 | 24063.9248 | - 0.0000 | 24654.9591 | - 0.0000 |
| SYM+G4     | -11802.4512 | 23938.9023 | - 0.0000 | 24077.1092 | - 0.0000 | 24665.7914 | - 0.0000 |
| TIM3e+I+G4 | -11806.4984 | 23944.9969 | - 0.0000 | 24081.2229 | - 0.0000 | 24667.5334 | - 0.0000 |
| TVMe+I+G4  | -11807.0323 | 23948.0645 | - 0.0000 | 24086.2714 | - 0.0000 | 24674.9536 | - 0.0000 |
| TIM3e+G4   | -11814.3252 | 23958.6504 | - 0.0000 | 24092.9151 | - 0.0000 | 24676.8342 | - 0.0000 |
| TVMe+G4    | -11815.8279 | 23963.6558 | - 0.0000 | 24099.8819 | - 0.0000 | 24686.1923 | - 0.0000 |
| TIMe+I+G4  | -11824.3117 | 23980.6234 | - 0.0000 | 24116.8494 | - 0.0000 | 24703.1598 | - 0.0000 |
| TIM2e+I+G4 | -11828.6695 | 23989.3391 | - 0.0000 | 24125.5651 | - 0.0000 | 24711.8755 | - 0.0000 |
| TIMe+G4    | -11833.5128 | 23997.0256 | - 0.0000 | 24131.2903 | - 0.0000 | 24715.2095 | - 0.0000 |
| K3P+I+G4   | -11834.7754 | 23999.5508 | - 0.0000 | 24133.8155 | - 0.0000 | 24717.7347 | - 0.0000 |
| TNe+I+G4   | -11837.5864 | 24005.1728 | - 0.0000 | 24139.4375 | - 0.0000 | 24723.3567 | - 0.0000 |
| TIM2e+G4   | -11838.3120 | 24006.6240 | - 0.0000 | 24140.8887 | - 0.0000 | 24724.8078 | - 0.0000 |
| K3P+G4     | -11843.8514 | 24015.7027 | - 0.0000 | 24148.0254 | - 0.0000 | 24729.5339 | - 0.0000 |
| TNe+G4     | -11846.5872 | 24021.1744 | - 0.0000 | 24153.4971 | - 0.0000 | 24735.0056 | - 0.0000 |
| K2P+I+G4   | -11848.1071 | 24024.2143 | - 0.0000 | 24156.5370 | - 0.0000 | 24738.0455 | - 0.0000 |
| K2P+G4     | -11856.8883 | 24039.7765 | - 0.0000 | 24170.1765 | - 0.0000 | 24749.2551 | - 0.0000 |
| F81+I+G4   | -12070.7182 | 24473.4364 | - 0.0000 | 24609.6624 | - 0.0000 | 25195.9729 | - 0.0000 |
| F81+G4     | -12079.3243 | 24488.6486 | - 0.0000 | 24622.9133 | - 0.0000 | 25206.8325 | - 0.0000 |
| JC+I+G4    | -12097.7041 | 24521.4082 | - 0.0000 | 24651.8082 | - 0.0000 | 25230.8868 | - 0.0000 |
| JC+G4      | -12106.4522 | 24536.9045 | - 0.0000 | 24665.4008 | - 0.0000 | 25242.0304 | - 0.0000 |
| GTR+I      | -12194.7311 | 24729.4622 | - 0.0000 | 24873.7302 | - 0.0000 | 25469.4092 | - 0.0000 |
| SYM+I      | -12206.4019 | 24746.8037 | - 0.0000 | 24885.0106 | - 0.0000 | 25473.6928 | - 0.0000 |
| TIM2+I     | -12207.4450 | 24750.8900 | - 0.0000 | 24891.0974 | - 0.0000 | 25482.1317 | - 0.0000 |
| TVM+I      | -12210.9640 | 24759.9279 | - 0.0000 | 24902.1557 | - 0.0000 | 25495.5223 | - 0.0000 |
| TVMe+I     | -12221.0460 | 24774.0920 | - 0.0000 | 24910.3181 | - 0.0000 | 25496.6285 | - 0.0000 |
| TPM2+I     | -12234.7536 | 24803.5072 | - 0.0000 | 24941.7140 | - 0.0000 | 25530.3963 | - 0.0000 |
| TPM2u+I    | -12234.7540 | 24803.5079 | - 0.0000 | 24941.7148 | - 0.0000 | 25530.3970 | - 0.0000 |
| TIM3+I     | -12232.5914 | 24801.1829 | - 0.0000 | 24941.3903 | - 0.0000 | 25532.4246 | - 0.0000 |
| TIM+I      | -12234.3067 | 24804.6135 | - 0.0000 | 24944.8209 | - 0.0000 | 25535.8552 | - 0.0000 |
| TIM3e+I    | -12247.5247 | 24825.0494 | - 0.0000 | 24959.3141 | - 0.0000 | 25543.2332 | - 0.0000 |
| TPM3+I     | -12243.2841 | 24820.5682 | - 0.0000 | 24958.7751 | - 0.0000 | 25547.4573 | - 0.0000 |
| TPM3u+I    | -12243.2846 | 24820.5691 | - 0.0000 | 24958.7760 | - 0.0000 | 25547.4582 | - 0.0000 |
| TN+I       | -12243.3303 | 24820.6606 | - 0.0000 | 24958.8675 | - 0.0000 | 25547.5497 | - 0.0000 |
| TIM2e+I    | -12251.6062 | 24833.2123 | - 0.0000 | 24967.4770 | - 0.0000 | 25551.3962 | - 0.0000 |
| K3Pu+I     | -12253.3334 | 24840.6668 | - 0.0000 | 24978.8737 | - 0.0000 | 25567.5559 | - 0.0000 |
| HKY+I      | -12262.2329 | 24856.4659 | - 0.0000 | 24992.6919 | - 0.0000 | 25579.0024 | - 0.0000 |
| TIMe+I     | -12269.5123 | 24869.0247 | - 0.0000 | 25003.2894 | - 0.0000 | 25587.2085 | - 0.0000 |
| K3P+I      | -12284.1286 | 24896.2571 | - 0.0000 | 25028.5799 | - 0.0000 | 25610.0884 | - 0.0000 |
| TNe+I      | -12288.5018 | 24905.0035 | - 0.0000 | 25037.3262 | - 0.0000 | 25618.8347 | - 0.0000 |

|       |             |            |          |            |          |            |          |
|-------|-------------|------------|----------|------------|----------|------------|----------|
| K2P+I | -12303.1952 | 24932.3904 | - 0.0000 | 25062.7904 | - 0.0000 | 25641.8689 | - 0.0000 |
| JC+I  | -12532.4891 | 25388.9781 | - 0.0000 | 25517.4745 | - 0.0000 | 26094.1041 | - 0.0000 |
| F81+I | -12525.3294 | 25380.6589 | - 0.0000 | 25514.9236 | - 0.0000 | 26098.8427 | - 0.0000 |
| GTR   | -12620.8880 | 25579.7761 | - 0.0000 | 25722.0038 | - 0.0000 | 26315.3704 | - 0.0000 |
| TVM   | -12627.8107 | 25591.6215 | - 0.0000 | 25731.8289 | - 0.0000 | 26322.8632 | - 0.0000 |
| SYM   | -12644.2744 | 25620.5487 | - 0.0000 | 25756.7748 | - 0.0000 | 26343.0852 | - 0.0000 |
| TVMe  | -12660.3856 | 25650.7712 | - 0.0000 | 25785.0359 | - 0.0000 | 26368.9551 | - 0.0000 |
| TPM3u | -12673.0593 | 25678.1186 | - 0.0000 | 25814.3446 | - 0.0000 | 26400.6550 | - 0.0000 |
| TPM3  | -12673.0643 | 25678.1285 | - 0.0000 | 25814.3546 | - 0.0000 | 26400.6650 | - 0.0000 |
| TIM3  | -12670.0064 | 25674.0128 | - 0.0000 | 25812.2197 | - 0.0000 | 26400.9019 | - 0.0000 |
| TIM3e | -12687.5810 | 25703.1621 | - 0.0000 | 25835.4848 | - 0.0000 | 26416.9933 | - 0.0000 |
| TIM2e | -12741.6041 | 25811.2083 | - 0.0000 | 25943.5310 | - 0.0000 | 26525.0395 | - 0.0000 |
| TIM2  | -12732.0851 | 25798.1701 | - 0.0000 | 25936.3770 | - 0.0000 | 26525.0592 | - 0.0000 |
| TPM2  | -12751.3422 | 25834.6845 | - 0.0000 | 25970.9105 | - 0.0000 | 26557.2210 | - 0.0000 |
| TPM2u | -12751.3450 | 25834.6900 | - 0.0000 | 25970.9160 | - 0.0000 | 26557.2264 | - 0.0000 |
| TIMe  | -12763.0300 | 25854.0600 | - 0.0000 | 25986.3828 | - 0.0000 | 26567.8912 | - 0.0000 |
| TIM   | -12760.0418 | 25854.0835 | - 0.0000 | 25992.2904 | - 0.0000 | 26580.9726 | - 0.0000 |
| K3P   | -12778.2931 | 25882.5862 | - 0.0000 | 26012.9862 | - 0.0000 | 26592.0647 | - 0.0000 |
| K3Pu  | -12772.1009 | 25876.2019 | - 0.0000 | 26012.4279 | - 0.0000 | 26598.7384 | - 0.0000 |
| TNe   | -12782.2717 | 25890.5434 | - 0.0000 | 26020.9434 | - 0.0000 | 26600.0220 | - 0.0000 |
| TN    | -12776.6329 | 25885.2657 | - 0.0000 | 26021.4918 | - 0.0000 | 26607.8022 | - 0.0000 |
| K2P   | -12797.5754 | 25919.1508 | - 0.0000 | 26047.6471 | - 0.0000 | 26624.2767 | - 0.0000 |
| HKY   | -12788.6981 | 25907.3961 | - 0.0000 | 26041.6608 | - 0.0000 | 26625.5800 | - 0.0000 |
| JC    | -13020.3052 | 26362.6104 | - 0.0000 | 26489.2221 | - 0.0000 | 27063.3838 | - 0.0000 |
| F81   | -13019.2185 | 26366.4370 | - 0.0000 | 26498.7598 | - 0.0000 | 27080.2682 | - 0.0000 |

## SUBSTITUTION PROCESS

Model of substitution: TPM2u+F+I+G4

Rate parameter R:

A-C: 1.1236  
 A-G: 3.6249  
 A-T: 1.1236  
 C-G: 1.0000  
 C-T: 3.6249  
 G-T: 1.0000

State frequencies: (empirical counts from alignment)

pi(A) = 0.2045  
 pi(C) = 0.2845  
 pi(G) = 0.3258  
 pi(T) = 0.1852

Rate matrix Q:

|   |        |         |         |        |
|---|--------|---------|---------|--------|
| A | -1.232 | 0.2305  | 0.8516  | 0.15   |
| C | 0.1657 | -0.8846 | 0.2349  | 0.4839 |
| G | 0.5346 | 0.2051  | -0.8732 | 0.1335 |
| T | 0.1657 | 0.7435  | 0.2349  | -1.144 |

Model of rate heterogeneity: Invar+Gamma with 4 categories

Proportion of invariable sites: 0.1458

Gamma shape alpha: 0.6881

| Category | Relative_rate | Proportion |
|----------|---------------|------------|
| 0        | 0             | 0.1458     |
| 1        | 0.08387       | 0.2136     |
| 2        | 0.4189        | 0.2136     |
| 3        | 1.077         | 0.2136     |
| 4        | 3.102         | 0.2136     |

Relative rates are computed as MEAN of the portion of the Gamma distribution falling in the category.

## D Irs4

Best-fit model according to BIC: TIM3+I+G4

List of models sorted by BIC scores:

| Model      | LogL        | AIC        | w-AIC    | AICc       | w-AICc   | BIC        | w-BIC    |
|------------|-------------|------------|----------|------------|----------|------------|----------|
| TIM3+I+G4  | -21104.9047 | 42583.8094 | + 0.5828 | 42677.5587 | + 0.7948 | 43489.5906 | + 0.8420 |
| TPM3u+I+G4 | -21110.7285 | 42593.4570 | - 0.0047 | 42686.0855 | - 0.0112 | 43494.3944 | + 0.0762 |
| TPM3+I+G4  | -21110.7581 | 42593.5162 | - 0.0045 | 42686.1447 | - 0.0109 | 43494.4537 | + 0.0740 |
| GTR+I+G4   | -21103.2915 | 42584.5830 | + 0.3959 | 42680.5990 | + 0.1738 | 43500.0517 | - 0.0045 |
| TIM3e+I+G4 | -21121.3867 | 42610.7734 | - 0.0000 | 42701.1851 | - 0.0000 | 43502.0234 | - 0.0017 |
| TVM+I+G4   | -21107.7813 | 42591.5626 | - 0.0121 | 42686.4411 | - 0.0094 | 43502.1876 | - 0.0015 |
| SYM+I+G4   | -21121.3255 | 42614.6511 | - 0.0000 | 42707.2796 | - 0.0000 | 43515.5886 | - 0.0000 |
| TN+I+G4    | -21122.1052 | 42616.2103 | - 0.0000 | 42708.8388 | - 0.0000 | 43517.1478 | - 0.0000 |
| TIM2+I+G4  | -21120.0751 | 42614.1502 | - 0.0000 | 42707.8995 | - 0.0000 | 43519.9314 | - 0.0000 |
| TIM3+G4    | -21123.5335 | 42619.0670 | - 0.0000 | 42711.6955 | - 0.0000 | 43520.0045 | - 0.0000 |
| TIM+I+G4   | -21122.0272 | 42618.0543 | - 0.0000 | 42711.8036 | - 0.0000 | 43523.8356 | - 0.0000 |
| TPM3+G4    | -21129.2733 | 42628.5466 | - 0.0000 | 42720.0625 | - 0.0000 | 43524.6403 | - 0.0000 |
| TPM3u+G4   | -21129.3145 | 42628.6291 | - 0.0000 | 42720.1450 | - 0.0000 | 43524.7228 | - 0.0000 |
| TPM2u+I+G4 | -21126.7353 | 42625.4707 | - 0.0000 | 42718.0992 | - 0.0000 | 43526.4082 | - 0.0000 |
| TPM2+I+G4  | -21126.7799 | 42625.5597 | - 0.0000 | 42718.1882 | - 0.0000 | 43526.4972 | - 0.0000 |
| HKY+I+G4   | -21130.6459 | 42631.2918 | - 0.0000 | 42722.8078 | - 0.0000 | 43527.3856 | - 0.0000 |
| TIM3e+G4   | -21138.6504 | 42643.3008 | - 0.0000 | 42732.6164 | - 0.0000 | 43529.7070 | - 0.0000 |
| TVM+G4     | -21125.0247 | 42624.0493 | - 0.0000 | 42717.7987 | - 0.0000 | 43529.8306 | - 0.0000 |
| GTR+G4     | -21122.4763 | 42620.9526 | - 0.0000 | 42715.8311 | - 0.0000 | 43531.5776 | - 0.0000 |
| K3Pu+I+G4  | -21130.5480 | 42633.0960 | - 0.0000 | 42725.7245 | - 0.0000 | 43534.0335 | - 0.0000 |
| SYM+G4     | -21138.6178 | 42647.2356 | - 0.0000 | 42738.7516 | - 0.0000 | 43543.3294 | - 0.0000 |
| TVMe+I+G4  | -21138.6648 | 42647.3295 | - 0.0000 | 42738.8455 | - 0.0000 | 43543.4233 | - 0.0000 |
| TN+G4      | -21142.8146 | 42655.6292 | - 0.0000 | 42747.1452 | - 0.0000 | 43551.7230 | - 0.0000 |
| TIM2+G4    | -21139.9244 | 42651.8488 | - 0.0000 | 42744.4773 | - 0.0000 | 43552.7863 | - 0.0000 |
| TPM2+G4    | -21145.0208 | 42660.0417 | - 0.0000 | 42751.5576 | - 0.0000 | 43556.1354 | - 0.0000 |
| TPM2u+G4   | -21145.0600 | 42660.1200 | - 0.0000 | 42751.6360 | - 0.0000 | 43556.2137 | - 0.0000 |
| TIM+G4     | -21142.4987 | 42656.9975 | - 0.0000 | 42749.6260 | - 0.0000 | 43557.9350 | - 0.0000 |
| HKY+G4     | -21150.5016 | 42669.0032 | - 0.0000 | 42759.4149 | - 0.0000 | 43560.2532 | - 0.0000 |
| K3Pu+G4    | -21150.2423 | 42670.4845 | - 0.0000 | 42762.0005 | - 0.0000 | 43566.5783 | - 0.0000 |
| TVMe+G4    | -21156.6591 | 42681.3183 | - 0.0000 | 42771.7299 | - 0.0000 | 43572.5682 | - 0.0000 |
| TNe+I+G4   | -21169.7111 | 42705.4221 | - 0.0000 | 42794.7378 | - 0.0000 | 43591.8284 | - 0.0000 |
| TIMe+I+G4  | -21169.0738 | 42706.1476 | - 0.0000 | 42796.5593 | - 0.0000 | 43597.3976 | - 0.0000 |
| TIM2e+I+G4 | -21169.6614 | 42707.3229 | - 0.0000 | 42797.7346 | - 0.0000 | 43598.5729 | - 0.0000 |
| K2P+I+G4   | -21184.4535 | 42732.9069 | - 0.0000 | 42821.1347 | - 0.0000 | 43614.4694 | - 0.0000 |
| K3P+I+G4   | -21183.8357 | 42733.6713 | - 0.0000 | 42822.9870 | - 0.0000 | 43620.0775 | - 0.0000 |
| TNe+G4     | -21187.7163 | 42739.4327 | - 0.0000 | 42827.6605 | - 0.0000 | 43620.9952 | - 0.0000 |
| TIMe+G4    | -21187.0838 | 42740.1676 | - 0.0000 | 42829.4832 | - 0.0000 | 43626.5738 | - 0.0000 |
| TIM2e+G4   | -21187.6151 | 42741.2301 | - 0.0000 | 42830.5458 | - 0.0000 | 43627.6364 | - 0.0000 |
| K2P+G4     | -21202.9679 | 42767.9358 | - 0.0000 | 42855.0840 | - 0.0000 | 43644.6546 | - 0.0000 |
| K3P+G4     | -21202.4192 | 42768.8384 | - 0.0000 | 42857.0662 | - 0.0000 | 43650.4009 | - 0.0000 |
| F81+I+G4   | -21906.4755 | 44180.9510 | - 0.0000 | 44271.3627 | - 0.0000 | 45072.2010 | - 0.0000 |
| F81+G4     | -21925.6343 | 44217.2686 | - 0.0000 | 44306.5843 | - 0.0000 | 45103.6749 | - 0.0000 |
| JC+I+G4    | -21934.4505 | 44230.9010 | - 0.0000 | 44318.0491 | - 0.0000 | 45107.6197 | - 0.0000 |
| JC+G4      | -21952.3877 | 44264.7754 | - 0.0000 | 44350.8520 | - 0.0000 | 45136.6504 | - 0.0000 |
| GTR+I      | -21964.8989 | 44305.7978 | - 0.0000 | 44400.6763 | - 0.0000 | 45216.4228 | - 0.0000 |
| SYM+I      | -22003.2482 | 44376.4963 | - 0.0000 | 44468.0123 | - 0.0000 | 45272.5901 | - 0.0000 |
| TIM3+I     | -22001.3403 | 44374.6807 | - 0.0000 | 44467.3092 | - 0.0000 | 45275.6182 | - 0.0000 |
| TIM3e+I    | -22016.2970 | 44398.5940 | - 0.0000 | 44487.9096 | - 0.0000 | 45285.0002 | - 0.0000 |
| TVM+I      | -22004.9399 | 44383.8799 | - 0.0000 | 44477.6292 | - 0.0000 | 45289.6611 | - 0.0000 |
| TIM2+I     | -22015.5735 | 44403.1471 | - 0.0000 | 44495.7756 | - 0.0000 | 45304.0846 | - 0.0000 |
| TPM3u+I    | -22035.7685 | 44441.5371 | - 0.0000 | 44533.0530 | - 0.0000 | 45337.6308 | - 0.0000 |
| TPM3+I     | -22035.7725 | 44441.5451 | - 0.0000 | 44533.0610 | - 0.0000 | 45337.6388 | - 0.0000 |
| TN+I       | -22050.9787 | 44471.9573 | - 0.0000 | 44563.4733 | - 0.0000 | 45368.0510 | - 0.0000 |
| TIM+I      | -22047.7143 | 44467.4286 | - 0.0000 | 44560.0571 | - 0.0000 | 45368.3661 | - 0.0000 |
| TVMe+I     | -22055.0205 | 44478.0410 | - 0.0000 | 44568.4527 | - 0.0000 | 45369.2910 | - 0.0000 |
| TIM2e+I    | -22072.0220 | 44510.0440 | - 0.0000 | 44599.3596 | - 0.0000 | 45396.4502 | - 0.0000 |
| TPM2+I     | -22073.0261 | 44516.0522 | - 0.0000 | 44607.5681 | - 0.0000 | 45412.1459 | - 0.0000 |
| TPM2u+I    | -22073.0269 | 44516.0539 | - 0.0000 | 44607.5698 | - 0.0000 | 45412.1476 | - 0.0000 |
| TNe+I      | -22084.6613 | 44533.3227 | - 0.0000 | 44621.5505 | - 0.0000 | 45414.8852 | - 0.0000 |
| TIMe+I     | -22082.7131 | 44531.4262 | - 0.0000 | 44620.7418 | - 0.0000 | 45417.8324 | - 0.0000 |
| HKY+I      | -22100.6647 | 44569.3294 | - 0.0000 | 44659.7411 | - 0.0000 | 45460.5794 | - 0.0000 |
| K3Pu+I     | -22097.6869 | 44565.3737 | - 0.0000 | 44656.8897 | - 0.0000 | 45461.4675 | - 0.0000 |
| K2P+I      | -22136.2307 | 44634.4614 | - 0.0000 | 44721.6095 | - 0.0000 | 45511.1801 | - 0.0000 |

|       |             |            |          |            |          |            |          |
|-------|-------------|------------|----------|------------|----------|------------|----------|
| K3P+I | -22134.2769 | 44632.5538 | - 0.0000 | 44720.7817 | - 0.0000 | 45514.1163 | - 0.0000 |
| F81+I | -22812.5006 | 45991.0012 | - 0.0000 | 46080.3168 | - 0.0000 | 46877.4074 | - 0.0000 |
| JC+I  | -22834.7669 | 46029.5338 | - 0.0000 | 46115.6104 | - 0.0000 | 46901.4088 | - 0.0000 |
| GTR   | -22850.1749 | 46074.3497 | - 0.0000 | 46168.0991 | - 0.0000 | 46980.1310 | - 0.0000 |
| TIM3  | -22884.4119 | 46138.8238 | - 0.0000 | 46230.3397 | - 0.0000 | 47034.9175 | - 0.0000 |
| TVM   | -22890.7385 | 46153.4770 | - 0.0000 | 46246.1055 | - 0.0000 | 47054.4145 | - 0.0000 |
| TPM3u | -22919.4192 | 46206.8384 | - 0.0000 | 46297.2501 | - 0.0000 | 47098.0884 | - 0.0000 |
| TPM3  | -22919.5024 | 46207.0047 | - 0.0000 | 46297.4164 | - 0.0000 | 47098.2547 | - 0.0000 |
| SYM   | -22927.2017 | 46222.4033 | - 0.0000 | 46312.8150 | - 0.0000 | 47113.6533 | - 0.0000 |
| TIM3e | -22938.2656 | 46240.5312 | - 0.0000 | 46328.7590 | - 0.0000 | 47122.0937 | - 0.0000 |
| TVMe  | -22989.5995 | 46345.1991 | - 0.0000 | 46434.5147 | - 0.0000 | 47231.6053 | - 0.0000 |
| TIM2  | -23006.8977 | 46383.7955 | - 0.0000 | 46475.3114 | - 0.0000 | 47279.8892 | - 0.0000 |
| TN    | -23038.6443 | 46445.2886 | - 0.0000 | 46535.7003 | - 0.0000 | 47336.5386 | - 0.0000 |
| TIM   | -23035.7416 | 46441.4832 | - 0.0000 | 46532.9992 | - 0.0000 | 47337.5769 | - 0.0000 |
| TIM2e | -23048.2626 | 46460.5252 | - 0.0000 | 46548.7530 | - 0.0000 | 47342.0876 | - 0.0000 |
| TNe   | -23059.0061 | 46480.0122 | - 0.0000 | 46567.1603 | - 0.0000 | 47356.7309 | - 0.0000 |
| TIMe  | -23056.7850 | 46477.5700 | - 0.0000 | 46565.7978 | - 0.0000 | 47359.1325 | - 0.0000 |
| TPM2  | -23069.4687 | 46506.9374 | - 0.0000 | 46597.3491 | - 0.0000 | 47398.1874 | - 0.0000 |
| TPM2u | -23069.4849 | 46506.9699 | - 0.0000 | 46597.3816 | - 0.0000 | 47398.2199 | - 0.0000 |
| HKY   | -23094.2596 | 46554.5192 | - 0.0000 | 46643.8348 | - 0.0000 | 47440.9254 | - 0.0000 |
| K3Pu  | -23091.3800 | 46550.7600 | - 0.0000 | 46641.1716 | - 0.0000 | 47442.0099 | - 0.0000 |
| K2P   | -23119.3710 | 46598.7421 | - 0.0000 | 46684.8187 | - 0.0000 | 47470.6170 | - 0.0000 |
| K3P   | -23117.1354 | 46596.2707 | - 0.0000 | 46683.4188 | - 0.0000 | 47472.9894 | - 0.0000 |
| F81   | -23775.8679 | 47915.7358 | - 0.0000 | 48003.9636 | - 0.0000 | 48797.2983 | - 0.0000 |
| JC    | -23799.8716 | 47957.7431 | - 0.0000 | 48042.7563 | - 0.0000 | 48824.7744 | - 0.0000 |

## SUBSTITUTION PROCESS

Model of substitution: TIM3+F+I+G4

Rate parameter R:

A-C: 1.6638  
 A-G: 4.3668  
 A-T: 1.0000  
 C-G: 1.6638  
 C-T: 6.7858  
 G-T: 1.0000

State frequencies: (empirical counts from alignment)

pi(A) = 0.2427  
 pi(C) = 0.2583  
 pi(G) = 0.2805  
 pi(T) = 0.2185

Rate matrix Q:

|   |         |        |         |        |
|---|---------|--------|---------|--------|
| A | -0.9186 | 0.2108 | 0.6007  | 0.1072 |
| C | 0.1981  | -1.154 | 0.2289  | 0.7272 |
| G | 0.5199  | 0.2108 | -0.8378 | 0.1072 |
| T | 0.1191  | 0.8597 | 0.1376  | -1.116 |

Model of rate heterogeneity: Invar+Gamma with 4 categories

Proportion of invariable sites: 0.1648

Gamma shape alpha: 0.8079

| Category | Relative_rate | Proportion |
|----------|---------------|------------|
| 0        | 0             | 0.1648     |
| 1        | 0.1164        | 0.2088     |
| 2        | 0.4913        | 0.2088     |
| 3        | 1.148         | 0.2088     |
| 4        | 3.033         | 0.2088     |

Relative rates are computed as MEAN of the portion of the Gamma distribution falling in the category.



## E Irs paralogs

Best-fit model according to BIC: TIM2+I+G4

List of models sorted by BIC scores:

| Model      | LogL        | AIC        | w-AIC    | AICc       | w-AICc   | BIC        | w-BIC    |
|------------|-------------|------------|----------|------------|----------|------------|----------|
| TIM2+I+G4  | -16079.3675 | 32384.7350 | + 0.7800 | 32442.7620 | + 0.9193 | 32873.3875 | + 0.9962 |
| GTR+I+G4   | -16078.6334 | 32387.2668 | + 0.2200 | 32447.6288 | + 0.0807 | 32884.5681 | - 0.0037 |
| TN+I+G4    | -16092.7977 | 32409.5955 | - 0.0000 | 32466.4764 | - 0.0000 | 32893.9237 | - 0.0000 |
| TIM+I+G4   | -16091.1465 | 32408.2930 | - 0.0000 | 32466.3201 | - 0.0000 | 32896.9456 | - 0.0000 |
| TIM3+I+G4  | -16091.6646 | 32409.3291 | - 0.0000 | 32467.3562 | - 0.0000 | 32897.9817 | - 0.0000 |
| TPM2+I+G4  | -16097.7445 | 32419.4890 | - 0.0000 | 32476.3699 | - 0.0000 | 32903.8172 | - 0.0000 |
| TPM2u+I+G4 | -16098.3768 | 32420.7537 | - 0.0000 | 32477.6346 | - 0.0000 | 32905.0819 | - 0.0000 |
| TIM2+G4    | -16101.5357 | 32427.0714 | - 0.0000 | 32483.9523 | - 0.0000 | 32911.3996 | - 0.0000 |
| TVM+I+G4   | -16097.3660 | 32422.7320 | - 0.0000 | 32481.9193 | - 0.0000 | 32915.7089 | - 0.0000 |
| GTR+G4     | -16099.3216 | 32426.6433 | - 0.0000 | 32485.8306 | - 0.0000 | 32919.6202 | - 0.0000 |
| TN+G4      | -16115.6483 | 32453.2966 | - 0.0000 | 32509.0454 | - 0.0000 | 32933.3004 | - 0.0000 |
| TIM+G4     | -16113.4045 | 32450.8091 | - 0.0000 | 32507.6900 | - 0.0000 | 32935.1373 | - 0.0000 |
| TPM2+G4    | -16116.7598 | 32455.5196 | - 0.0000 | 32511.2685 | - 0.0000 | 32935.5235 | - 0.0000 |
| TPM2u+G4   | -16116.7983 | 32455.5967 | - 0.0000 | 32511.3456 | - 0.0000 | 32935.6005 | - 0.0000 |
| TIM3+G4    | -16115.5361 | 32455.0723 | - 0.0000 | 32511.9532 | - 0.0000 | 32939.4005 | - 0.0000 |
| TPM3u+I+G4 | -16119.4997 | 32462.9994 | - 0.0000 | 32519.8803 | - 0.0000 | 32947.3276 | - 0.0000 |
| TPM3+I+G4  | -16119.8312 | 32463.6625 | - 0.0000 | 32520.5434 | - 0.0000 | 32947.9907 | - 0.0000 |
| TVM+G4     | -16116.6825 | 32459.3650 | - 0.0000 | 32517.3921 | - 0.0000 | 32948.0176 | - 0.0000 |
| HKY+I+G4   | -16123.4228 | 32468.8457 | - 0.0000 | 32524.5946 | - 0.0000 | 32948.8495 | - 0.0000 |
| K3Pu+I+G4  | -16122.0571 | 32468.1141 | - 0.0000 | 32524.9950 | - 0.0000 | 32952.4423 | - 0.0000 |
| TPM3+G4    | -16142.5004 | 32507.0007 | - 0.0000 | 32562.7496 | - 0.0000 | 32987.0045 | - 0.0000 |
| TPM3u+G4   | -16142.5675 | 32507.1350 | - 0.0000 | 32562.8838 | - 0.0000 | 32987.1388 | - 0.0000 |
| HKY+G4     | -16146.8416 | 32513.6833 | - 0.0000 | 32568.3141 | - 0.0000 | 32989.3627 | - 0.0000 |
| TIM3e+I+G4 | -16148.0472 | 32516.0944 | - 0.0000 | 32570.7252 | - 0.0000 | 32991.7738 | - 0.0000 |
| K3Pu+G4    | -16145.0067 | 32512.0134 | - 0.0000 | 32567.7623 | - 0.0000 | 32992.0172 | - 0.0000 |
| SYM+I+G4   | -16144.4130 | 32512.8261 | - 0.0000 | 32569.7070 | - 0.0000 | 32997.1543 | - 0.0000 |
| TIM3e+G4   | -16170.4260 | 32558.8520 | - 0.0000 | 32612.3788 | - 0.0000 | 33030.2072 | - 0.0000 |
| SYM+G4     | -16167.0233 | 32556.0466 | - 0.0000 | 32611.7955 | - 0.0000 | 33036.0505 | - 0.0000 |
| TVMe+I+G4  | -16168.6524 | 32559.3047 | - 0.0000 | 32615.0536 | - 0.0000 | 33039.3086 | - 0.0000 |
| TIMe+I+G4  | -16188.2595 | 32596.5190 | - 0.0000 | 32651.1499 | - 0.0000 | 33072.1985 | - 0.0000 |
| TVMe+G4    | -16189.9464 | 32599.8929 | - 0.0000 | 32654.5237 | - 0.0000 | 33075.5723 | - 0.0000 |
| TNe+I+G4   | -16194.5266 | 32607.0533 | - 0.0000 | 32660.5801 | - 0.0000 | 33078.4084 | - 0.0000 |
| TIM2e+I+G4 | -16194.4322 | 32608.8645 | - 0.0000 | 32663.4954 | - 0.0000 | 33084.5440 | - 0.0000 |
| K3P+I+G4   | -16207.6655 | 32633.3310 | - 0.0000 | 32686.8578 | - 0.0000 | 33104.6861 | - 0.0000 |
| K2P+I+G4   | -16214.3612 | 32644.7224 | - 0.0000 | 32697.1589 | - 0.0000 | 33111.7531 | - 0.0000 |
| TIMe+G4    | -16211.7306 | 32641.4612 | - 0.0000 | 32694.9880 | - 0.0000 | 33112.8163 | - 0.0000 |
| TNe+G4     | -16217.5779 | 32651.1558 | - 0.0000 | 32703.5923 | - 0.0000 | 33118.1865 | - 0.0000 |
| TIM2e+G4   | -16217.5415 | 32653.0830 | - 0.0000 | 32706.6098 | - 0.0000 | 33124.4381 | - 0.0000 |
| K3P+G4     | -16230.8343 | 32677.6687 | - 0.0000 | 32730.1052 | - 0.0000 | 33144.6994 | - 0.0000 |
| K2P+G4     | -16237.0727 | 32688.1455 | - 0.0000 | 32739.5055 | - 0.0000 | 33150.8519 | - 0.0000 |
| F81+I+G4   | -16604.7409 | 33429.4818 | - 0.0000 | 33484.1126 | - 0.0000 | 33905.1613 | - 0.0000 |
| JC+I+G4    | -16614.4367 | 33442.8734 | - 0.0000 | 33494.2334 | - 0.0000 | 33905.5798 | - 0.0000 |
| F81+G4     | -16627.8107 | 33473.6215 | - 0.0000 | 33527.1483 | - 0.0000 | 33944.9766 | - 0.0000 |
| JC+G4      | -16637.3639 | 33486.7279 | - 0.0000 | 33537.0250 | - 0.0000 | 33945.1099 | - 0.0000 |
| GTR+I      | -16860.0023 | 33948.0047 | - 0.0000 | 34007.1920 | - 0.0000 | 34440.9816 | - 0.0000 |
| TVM+I      | -16882.2133 | 33990.4265 | - 0.0000 | 34048.4535 | - 0.0000 | 34479.0791 | - 0.0000 |
| SYM+I      | -16938.0403 | 34098.0805 | - 0.0000 | 34153.8294 | - 0.0000 | 34578.0844 | - 0.0000 |
| TIM2+I     | -16946.7898 | 34117.5796 | - 0.0000 | 34174.4605 | - 0.0000 | 34601.9078 | - 0.0000 |
| TIM3+I     | -16961.3188 | 34146.6377 | - 0.0000 | 34203.5186 | - 0.0000 | 34630.9659 | - 0.0000 |
| TVMe+I     | -16976.5817 | 34173.1634 | - 0.0000 | 34227.7943 | - 0.0000 | 34648.8429 | - 0.0000 |
| TIM3e+I    | -16983.3542 | 34184.7084 | - 0.0000 | 34238.2352 | - 0.0000 | 34656.0635 | - 0.0000 |
| TPM3+I     | -16977.4043 | 34176.8087 | - 0.0000 | 34232.5575 | - 0.0000 | 34656.8125 | - 0.0000 |
| TPM3u+I    | -16977.4174 | 34176.8348 | - 0.0000 | 34232.5837 | - 0.0000 | 34656.8386 | - 0.0000 |
| TPM2+I     | -17006.8148 | 34235.6295 | - 0.0000 | 34291.3784 | - 0.0000 | 34715.6333 | - 0.0000 |
| TPM2u+I    | -17006.8148 | 34235.6296 | - 0.0000 | 34291.3784 | - 0.0000 | 34715.6334 | - 0.0000 |
| TIM+I      | -17015.3520 | 34254.7040 | - 0.0000 | 34311.5849 | - 0.0000 | 34739.0322 | - 0.0000 |
| TIM2e+I    | -17029.4288 | 34276.8576 | - 0.0000 | 34330.3844 | - 0.0000 | 34748.2127 | - 0.0000 |
| TN+I       | -17036.3112 | 34294.6225 | - 0.0000 | 34350.3713 | - 0.0000 | 34774.6263 | - 0.0000 |
| TIMe+I     | -17058.7810 | 34335.5621 | - 0.0000 | 34389.0889 | - 0.0000 | 34806.9172 | - 0.0000 |
| TNe+I      | -17073.1605 | 34362.3211 | - 0.0000 | 34414.7576 | - 0.0000 | 34829.3519 | - 0.0000 |
| K3Pu+I     | -17065.0601 | 34352.1203 | - 0.0000 | 34407.8691 | - 0.0000 | 34832.1241 | - 0.0000 |
| HKY+I      | -17083.9665 | 34387.9330 | - 0.0000 | 34442.5639 | - 0.0000 | 34863.6125 | - 0.0000 |
| K3P+I      | -17097.3042 | 34410.6084 | - 0.0000 | 34463.0449 | - 0.0000 | 34877.6391 | - 0.0000 |

|       |             |            |          |            |          |            |          |
|-------|-------------|------------|----------|------------|----------|------------|----------|
| K2P+I | -17111.6370 | 34437.2739 | - 0.0000 | 34488.6339 | - 0.0000 | 34899.9803 | - 0.0000 |
| F81+I | -17445.3305 | 35108.6610 | - 0.0000 | 35162.1877 | - 0.0000 | 35580.0161 | - 0.0000 |
| JC+I  | -17463.7919 | 35139.5837 | - 0.0000 | 35189.8808 | - 0.0000 | 35597.9658 | - 0.0000 |
| GTR   | -17503.1970 | 35232.3941 | - 0.0000 | 35290.4211 | - 0.0000 | 35721.0467 | - 0.0000 |
| TVM   | -17512.9014 | 35249.8028 | - 0.0000 | 35306.6837 | - 0.0000 | 35734.1310 | - 0.0000 |
| TIM3  | -17569.3058 | 35360.6116 | - 0.0000 | 35416.3605 | - 0.0000 | 35840.6155 | - 0.0000 |
| TPM3u | -17574.6743 | 35369.3486 | - 0.0000 | 35423.9795 | - 0.0000 | 35845.0281 | - 0.0000 |
| TPM3  | -17574.6759 | 35369.3517 | - 0.0000 | 35423.9826 | - 0.0000 | 35845.0312 | - 0.0000 |
| SYM   | -17661.1555 | 35542.3110 | - 0.0000 | 35596.9419 | - 0.0000 | 36017.9905 | - 0.0000 |
| TIM3e | -17687.2348 | 35590.4695 | - 0.0000 | 35642.9060 | - 0.0000 | 36057.5003 | - 0.0000 |
| TVMe  | -17695.2827 | 35608.5653 | - 0.0000 | 35662.0921 | - 0.0000 | 36079.9205 | - 0.0000 |
| TIM2  | -17789.2906 | 35800.5812 | - 0.0000 | 35856.3301 | - 0.0000 | 36280.5851 | - 0.0000 |
| TIM2e | -17834.8084 | 35885.6168 | - 0.0000 | 35938.0533 | - 0.0000 | 36352.6476 | - 0.0000 |
| TIM   | -17826.7758 | 35875.5515 | - 0.0000 | 35931.3004 | - 0.0000 | 36355.5554 | - 0.0000 |
| TPM2  | -17831.7862 | 35883.5724 | - 0.0000 | 35938.2033 | - 0.0000 | 36359.2519 | - 0.0000 |
| TPM2u | -17831.7868 | 35883.5736 | - 0.0000 | 35938.2045 | - 0.0000 | 36359.2531 | - 0.0000 |
| TIME  | -17846.0274 | 35908.0549 | - 0.0000 | 35960.4914 | - 0.0000 | 36375.0857 | - 0.0000 |
| TN    | -17842.6723 | 35905.3446 | - 0.0000 | 35959.9755 | - 0.0000 | 36381.0241 | - 0.0000 |
| TNe   | -17859.6745 | 35933.3490 | - 0.0000 | 35984.7090 | - 0.0000 | 36396.0555 | - 0.0000 |
| K3Pu  | -17860.6241 | 35941.2482 | - 0.0000 | 35995.8791 | - 0.0000 | 36416.9277 | - 0.0000 |
| K3P   | -17876.0623 | 35966.1246 | - 0.0000 | 36017.4846 | - 0.0000 | 36428.8310 | - 0.0000 |
| HKY   | -17875.9701 | 35969.9403 | - 0.0000 | 36023.4670 | - 0.0000 | 36441.2954 | - 0.0000 |
| K2P   | -17889.6522 | 35991.3044 | - 0.0000 | 36041.6016 | - 0.0000 | 36449.6865 | - 0.0000 |
| F81   | -18211.6533 | 36639.3067 | - 0.0000 | 36691.7432 | - 0.0000 | 37106.3375 | - 0.0000 |
| JC    | -18229.1293 | 36668.2585 | - 0.0000 | 36717.5063 | - 0.0000 | 37122.3162 | - 0.0000 |

## SUBSTITUTION PROCESS

Model of substitution: TIM2+F+I+G4

Rate parameter R:

A-C: 1.0410  
A-G: 2.3035  
A-T: 1.0410  
C-G: 1.0000  
C-T: 5.1647  
G-T: 1.0000

State frequencies: (empirical counts from alignment)

pi(A) = 0.2555  
pi(C) = 0.2427  
pi(G) = 0.2937  
pi(T) = 0.2081

Rate matrix Q:

|   |         |        |         |        |
|---|---------|--------|---------|--------|
| A | -0.8352 | 0.1842 | 0.4931  | 0.1579 |
| C | 0.1939  | -1.191 | 0.2141  | 0.7832 |
| G | 0.429   | 0.1769 | -0.7576 | 0.1516 |
| T | 0.1939  | 0.9138 | 0.2141  | -1.322 |

Model of rate heterogeneity: Invar+Gamma with 4 categories

Proportion of invariable sites: 0.1461

Gamma shape alpha: 0.7185

| Category | Relative_rate | Proportion |
|----------|---------------|------------|
| 0        | 0             | 0.1461     |
| 1        | 0.09151       | 0.2135     |
| 2        | 0.4358        | 0.2135     |
| 3        | 1.091         | 0.2135     |
| 4        | 3.066         | 0.2135     |

Relative rates are computed as MEAN of the portion of the Gamma distribution falling in the category.

**Additional file 13: Supplementary Figure 9. Results of *ModelFinder* for (A) *Irs1*, (B) *Irs2*, (C) *Irs3*, (D) *Irs4*, and (E) family of *Irs* paralogs.** *ModelFinder* results used for constructing phylogenetic trees by Bayesian and Maximum likelihood methods presented in Figure 1 and in Additional files 4-8: Supplementary Figures 2-6. AIC, w-AIC: Akaike information criterion scores and weights. AICc, w-AICc: Corrected AIC scores and weights. BIC, w-BIC: Bayesian information criterion scores and weights. Plus signs denote the 95% confidence sets. Minus signs denote significant exclusion.
